# Supplementary material
Source: PubMed Central journal article supplement (PMC3082595)

# Supplemental Figure 4C

Intestine (100X)

WT IR 24 hr

IL-17A AB WT IR 24 hr

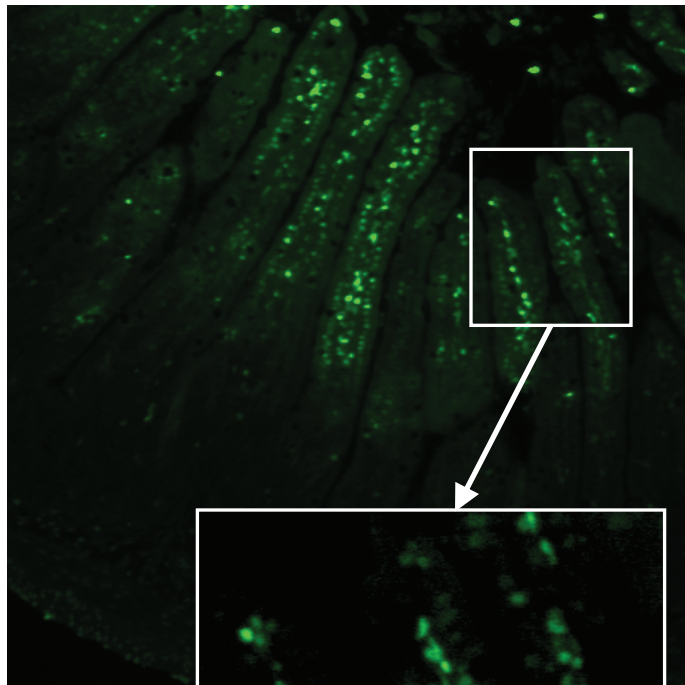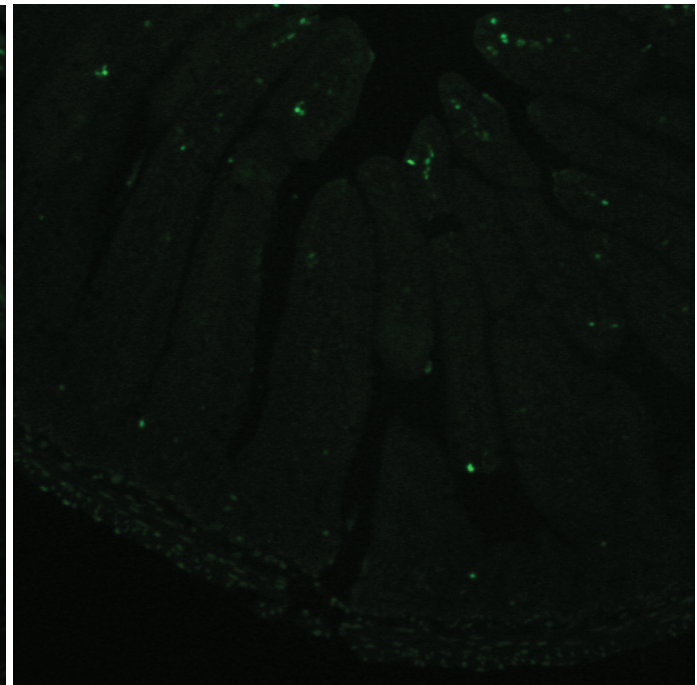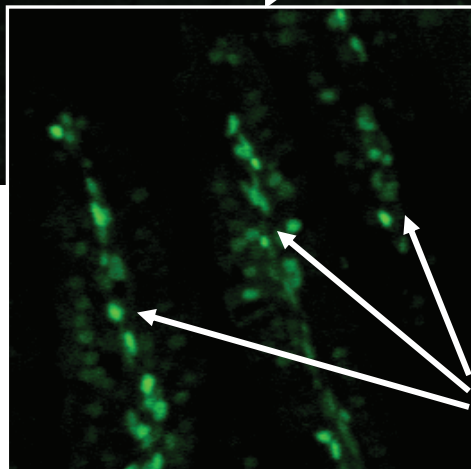

Endothelial cells

IL-17R KO IR 24 hr

IL-17A KO IR 24 hr

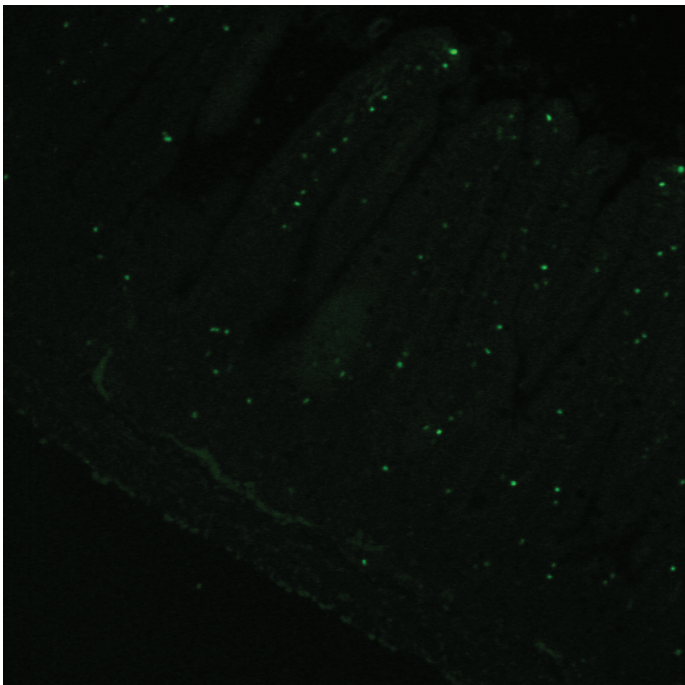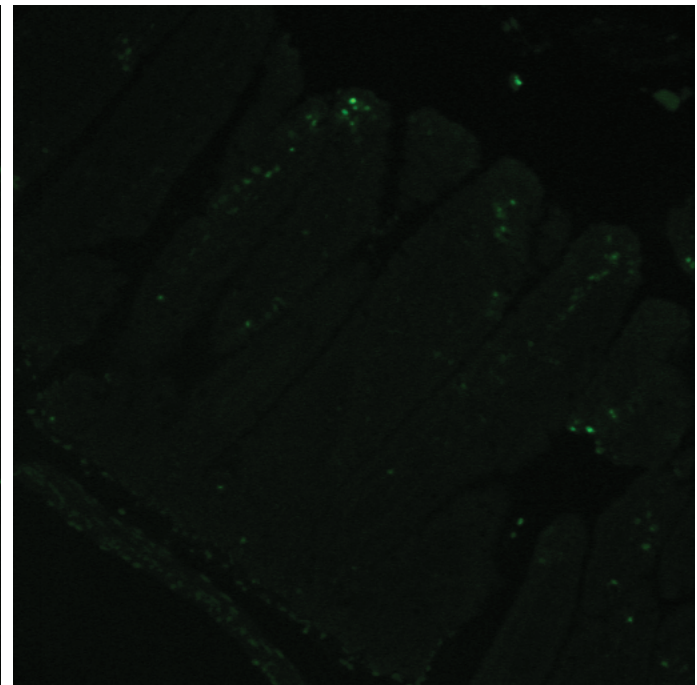

Supplement: NIHMS274034-supplement-Supp_Fig_S4c.pdf [file NIHMS274034-supplement-Supp_Fig_S4c.pdf]
