# Supplementary material
Source: PubMed Central journal article supplement (PMC3082595)
Supplement: NIHMS274034-supplement-Supp_Fig_S5b.pdf [file NIHMS274034-supplement-Supp_Fig_S5b.pdf]

# Supplemental figure 5B

Kidney

1000 bp

500 bp

200 bp

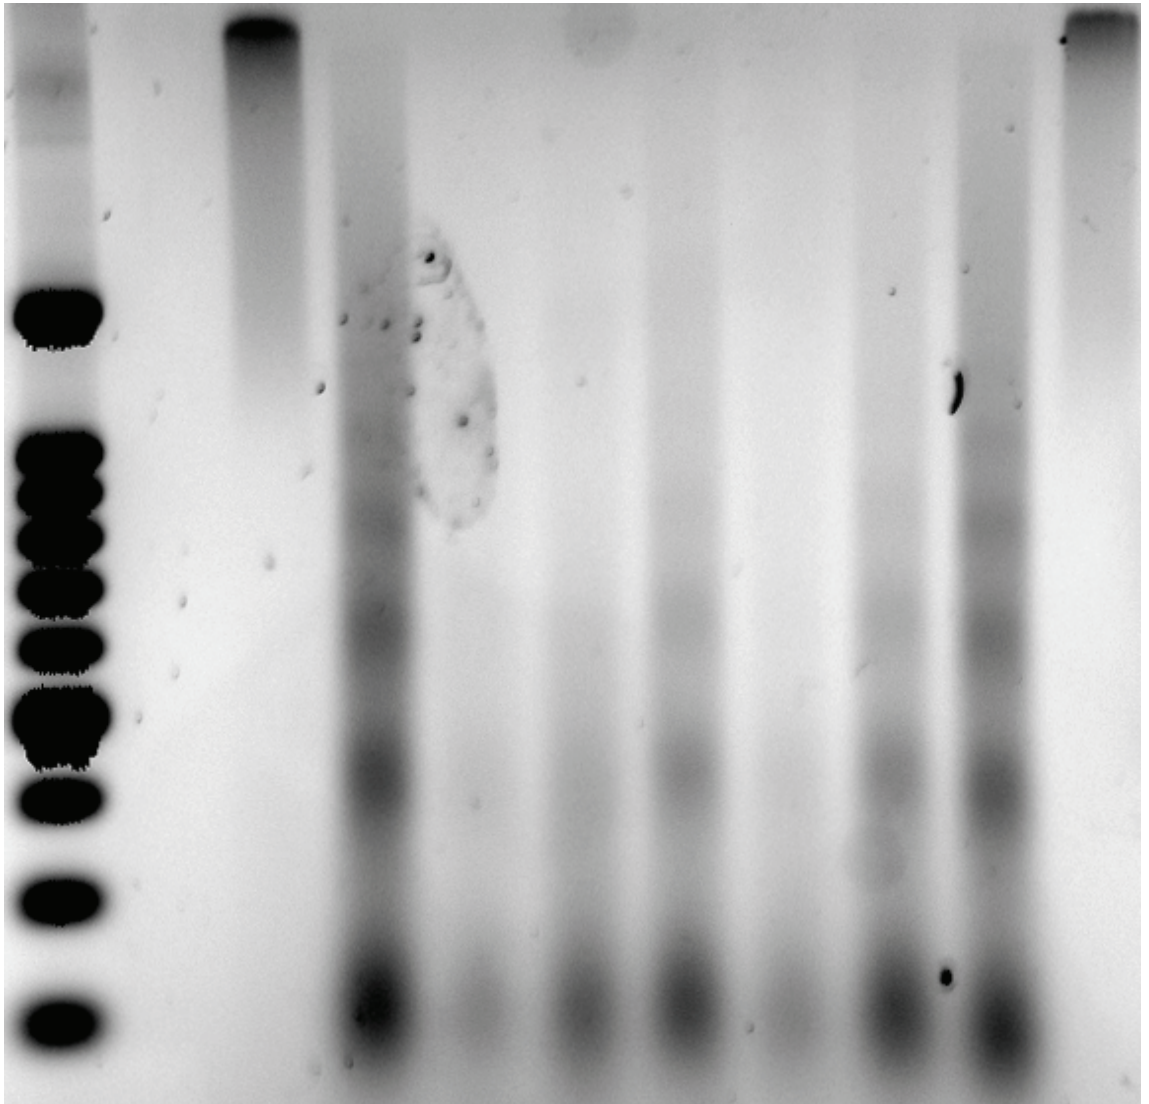

Sham 24 hr

WT IR 24 hr

200 µg IL-17A AB IR 24 hr

IL-17R KO IR 24 hr

IL-17A KO IR 24 hr

WT spleen to IL-17A KO IR

Dithizone IR 24 hr

Vehicle IR 24 hr

Dithizone sham 24 hr
