# Supplementary material
Source: PubMed Central journal article supplement (PMC3082595)
Supplement: NIHMS274034-supplement-Supp_Fig_S7c.pdf [file NIHMS274034-supplement-Supp_Fig_S7c.pdf]

# Supplemental figure 7C

Intestine (100X)

Vehicle sham 24 hr

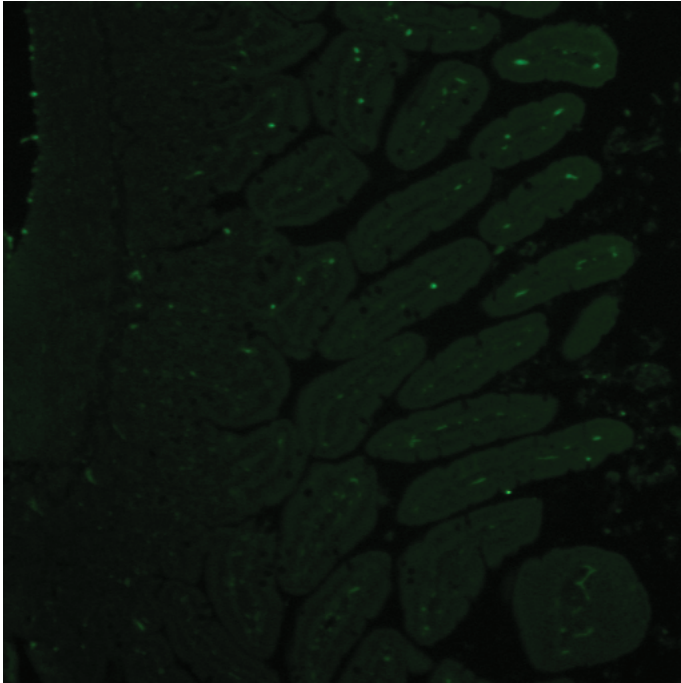

Dithizone sham 24 hr

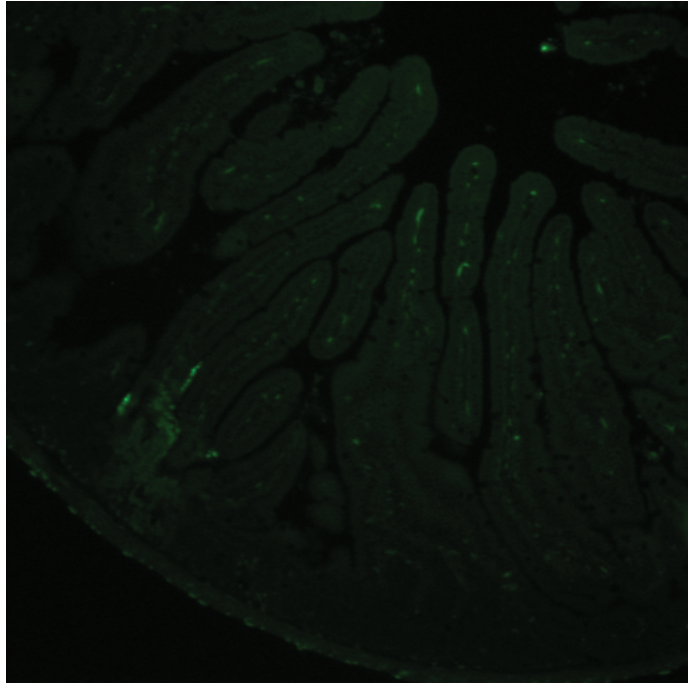

Vehicle IR 24 hr

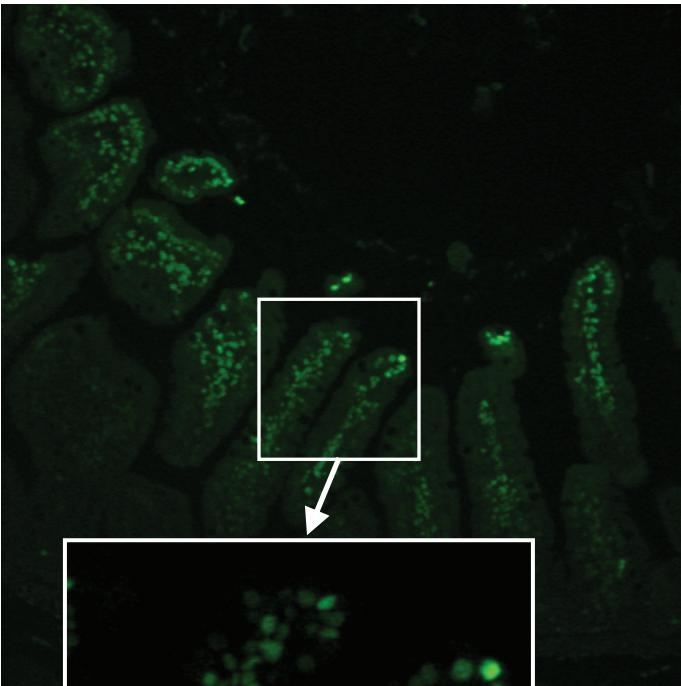

Dithizone IR 24 hr

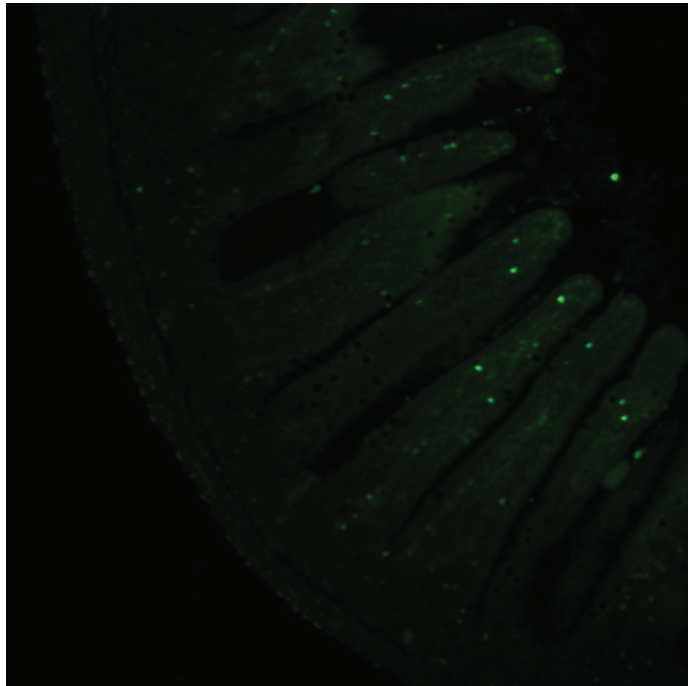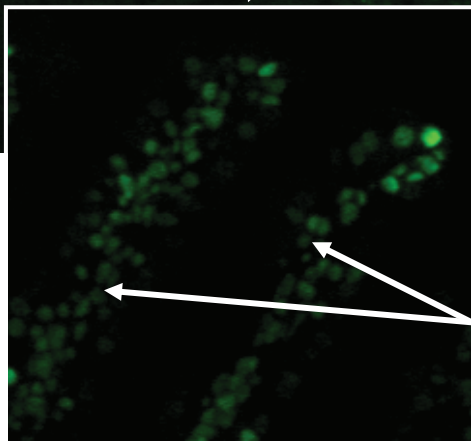

Endothelial cells
