# Supplementary material
Source: PubMed Central journal article supplement (PMC3082595)

# Supplemental Figure 1

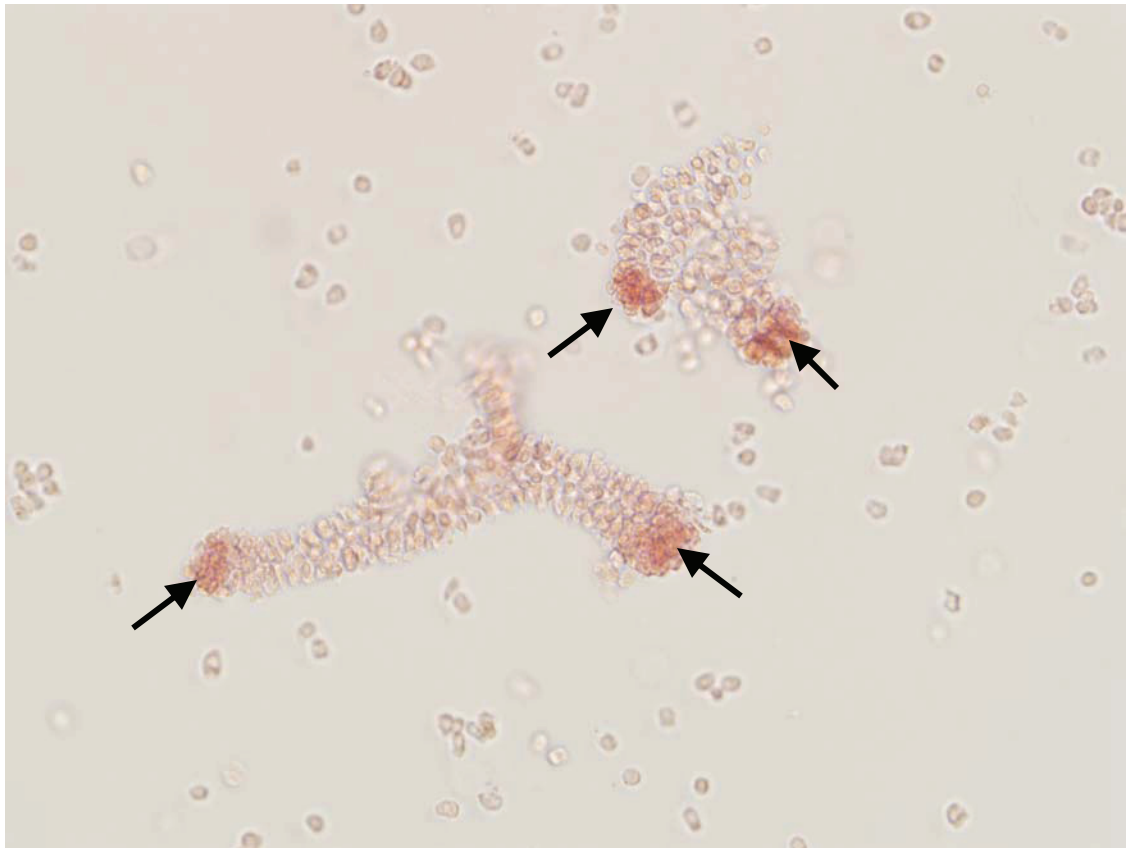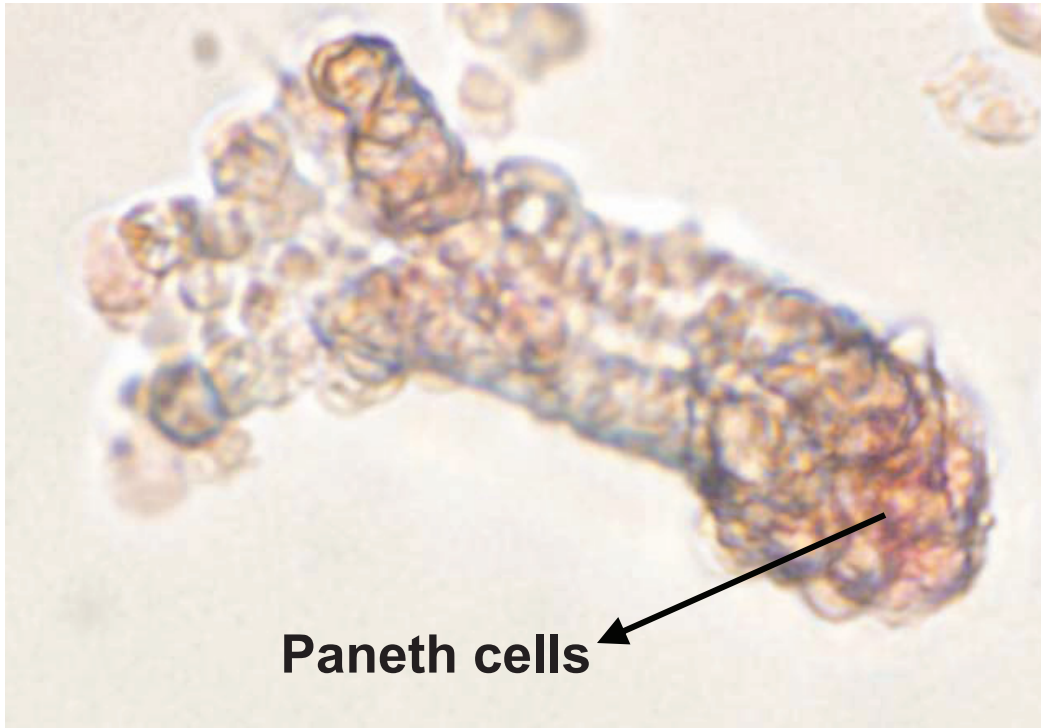

Single Small  
Intestine Crypt

Paneth cells

Supplement: NIHMS274034-supplement-Supp_Fig_S1.pdf [file NIHMS274034-supplement-Supp_Fig_S1.pdf]

IL-17R KO IR 24 hr

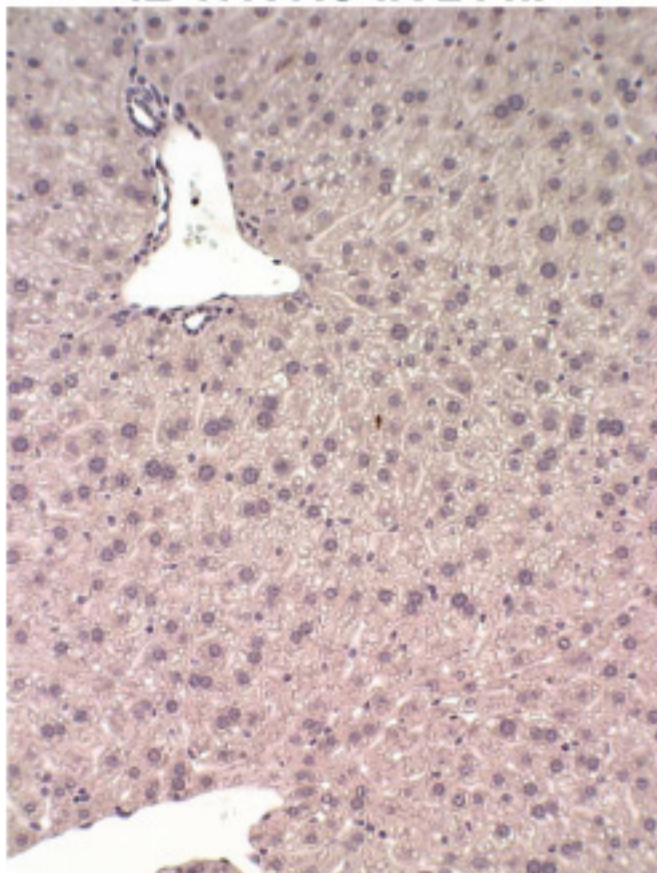

WT IR 24 hr

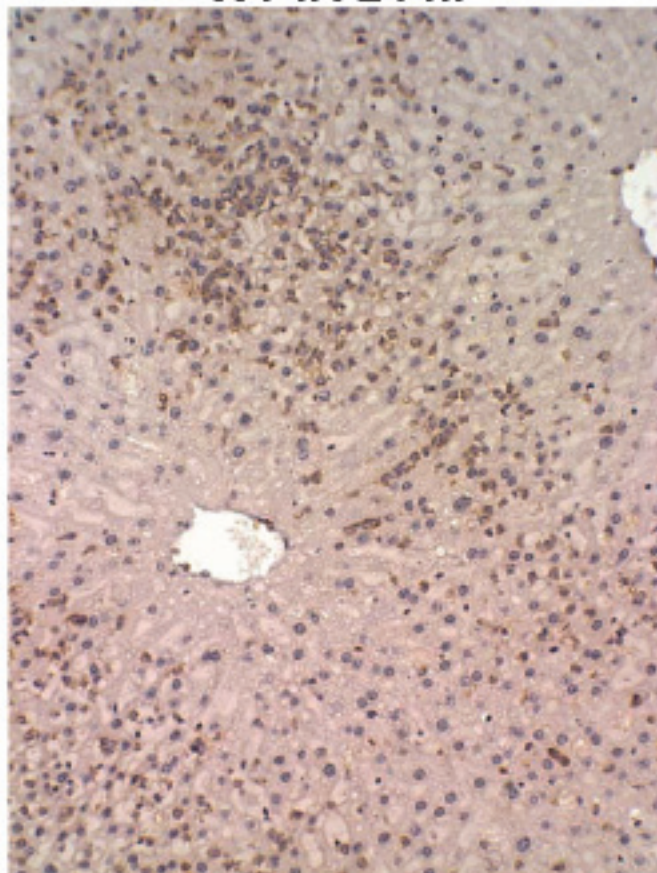

IL-17A KO IR 24 hr

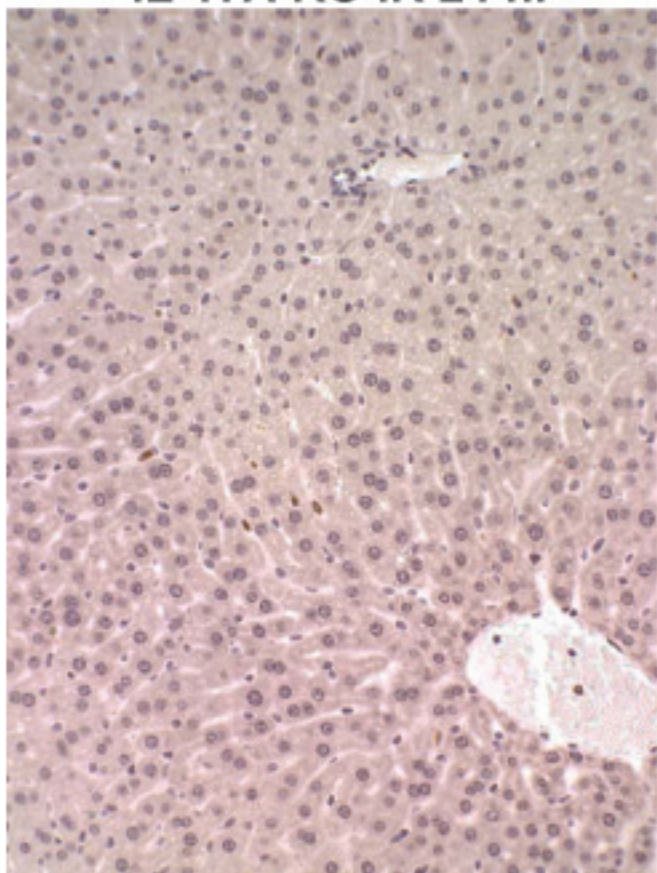

IL-17A AB IR 24 hr

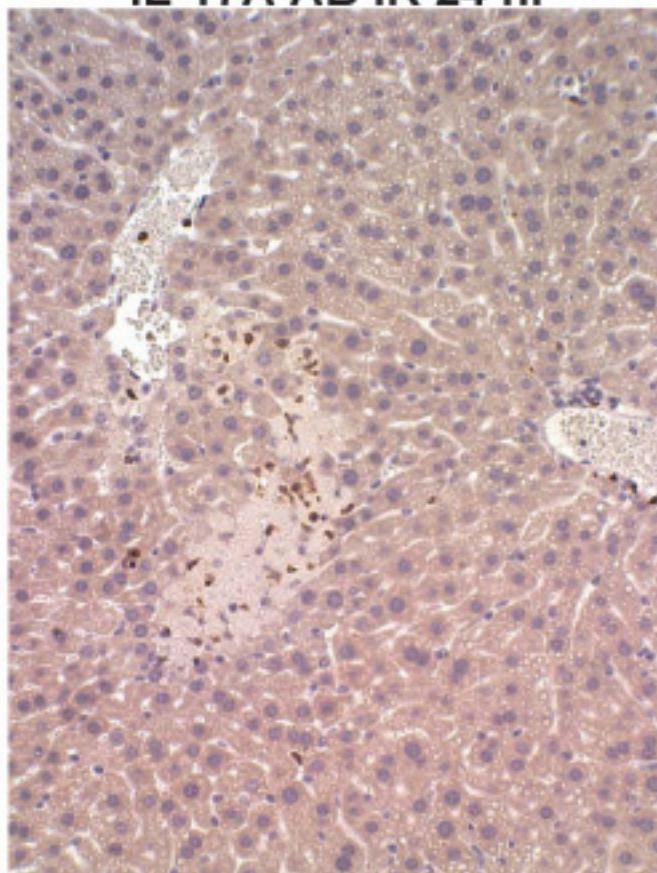

Supplement: NIHMS274034-supplement-Supp_Fig_S2a.pdf [file NIHMS274034-supplement-Supp_Fig_S2a.pdf]

IL-17R KO IR 24 hr

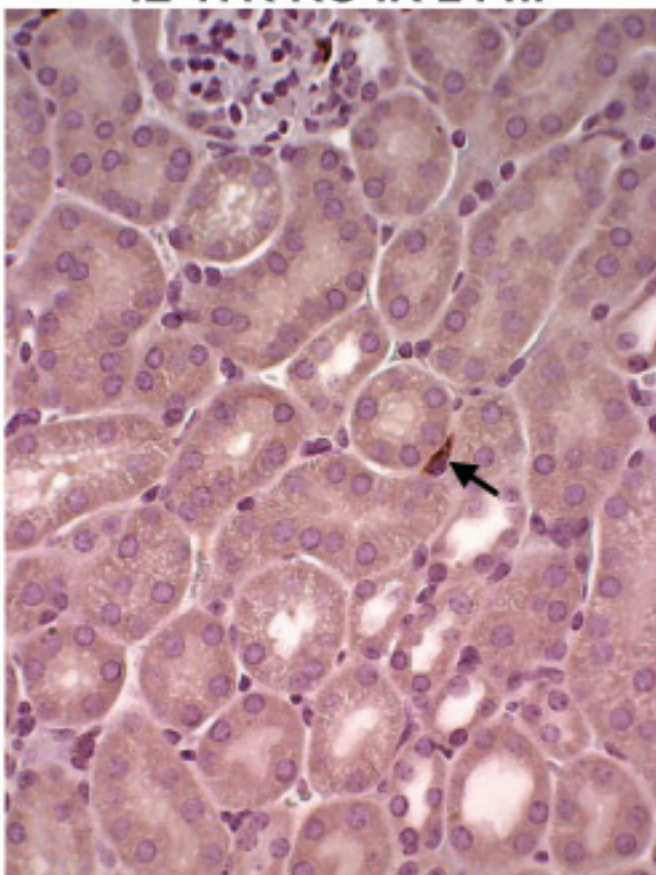

WT IR 24 hr

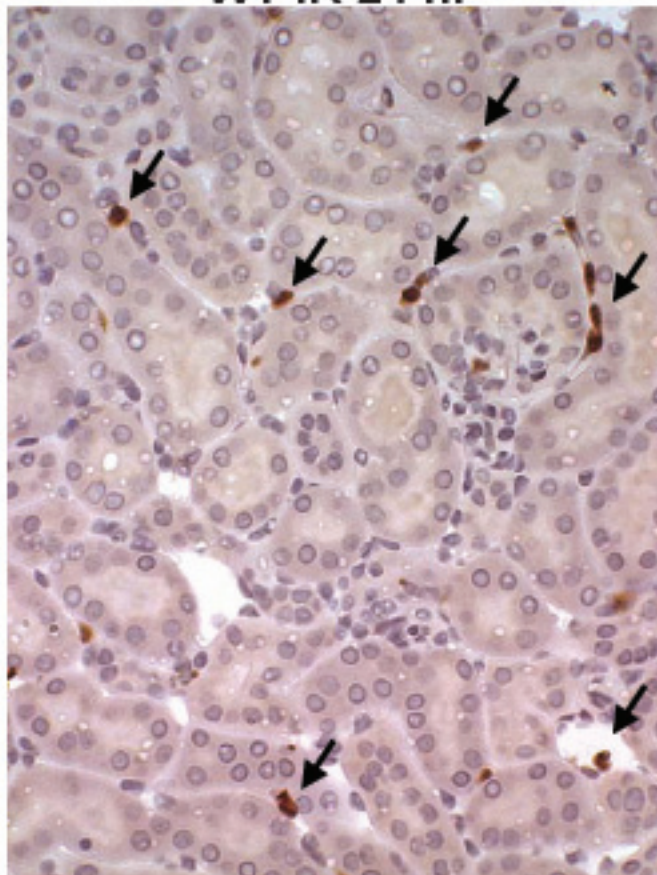

IL-17A KO IR 24 hr

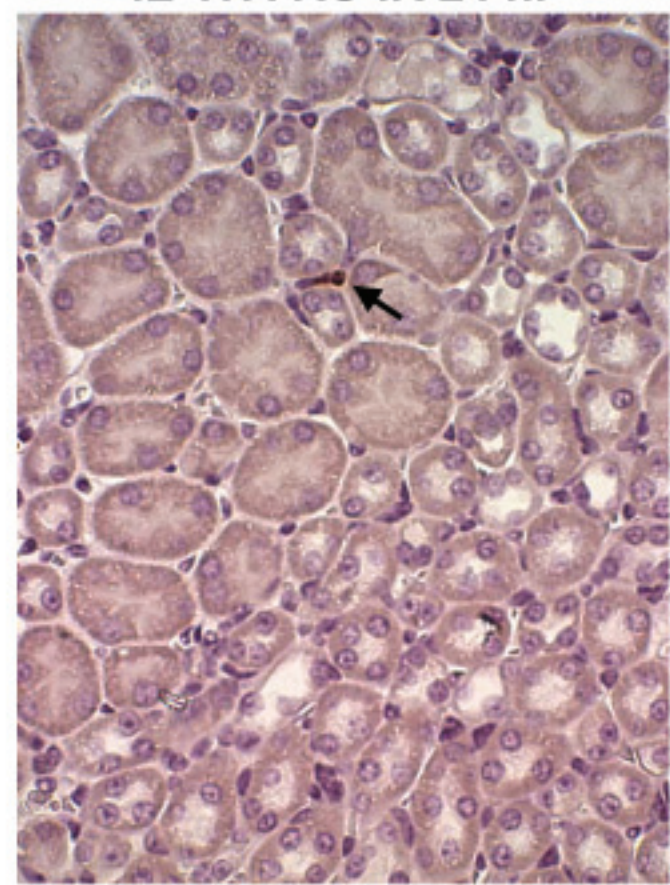

IL-17A AB IR 24 hr

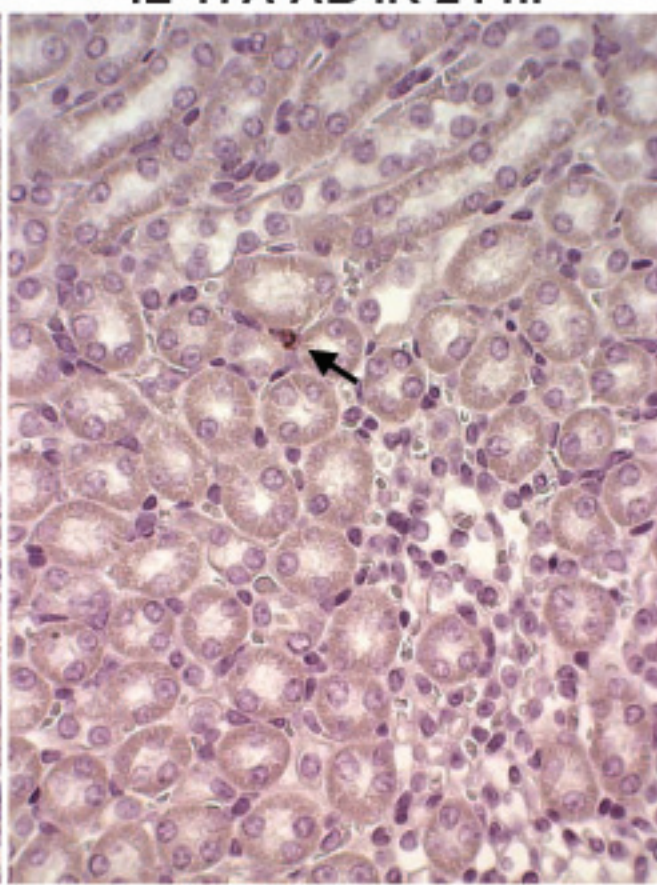

Supplement: NIHMS274034-supplement-Supp_Fig_S2b.pdf [file NIHMS274034-supplement-Supp_Fig_S2b.pdf]

IL-17R KO IR 24 hr

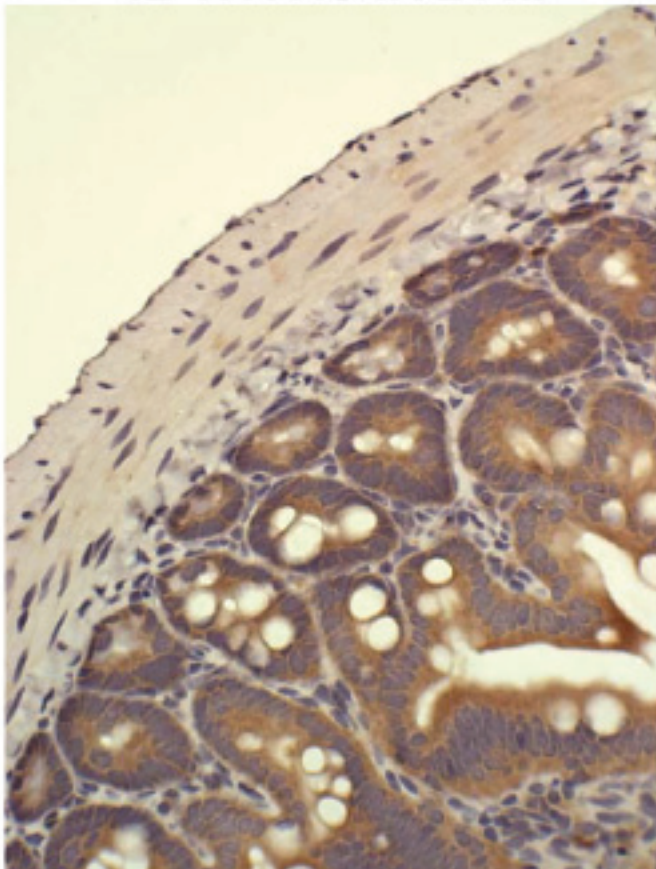

WT IR 24 hr

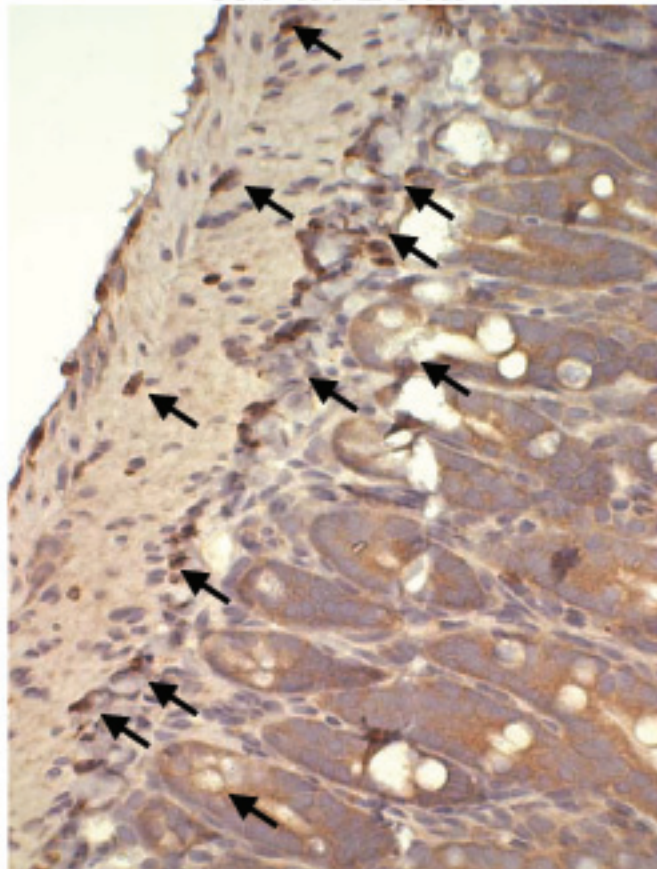

IL-17A KO IR 24 hr

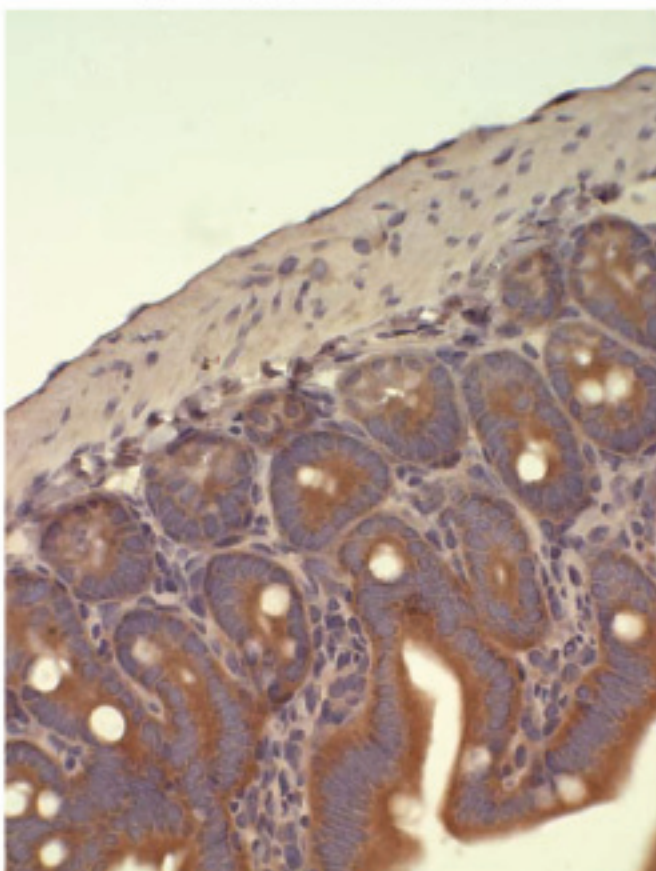

IL-17A AB IR 24 hr

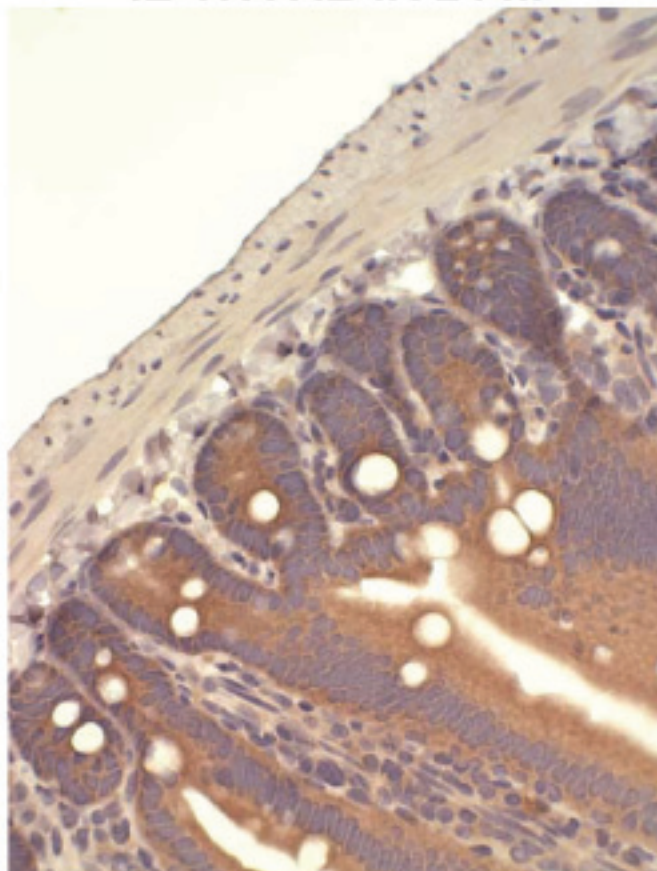

Supplement: NIHMS274034-supplement-Supp_Fig_S2c.pdf [file NIHMS274034-supplement-Supp_Fig_S2c.pdf]

**Supplemental**  
**Figure 3A**

60 min liver ischemia and 24 hr reperfusion

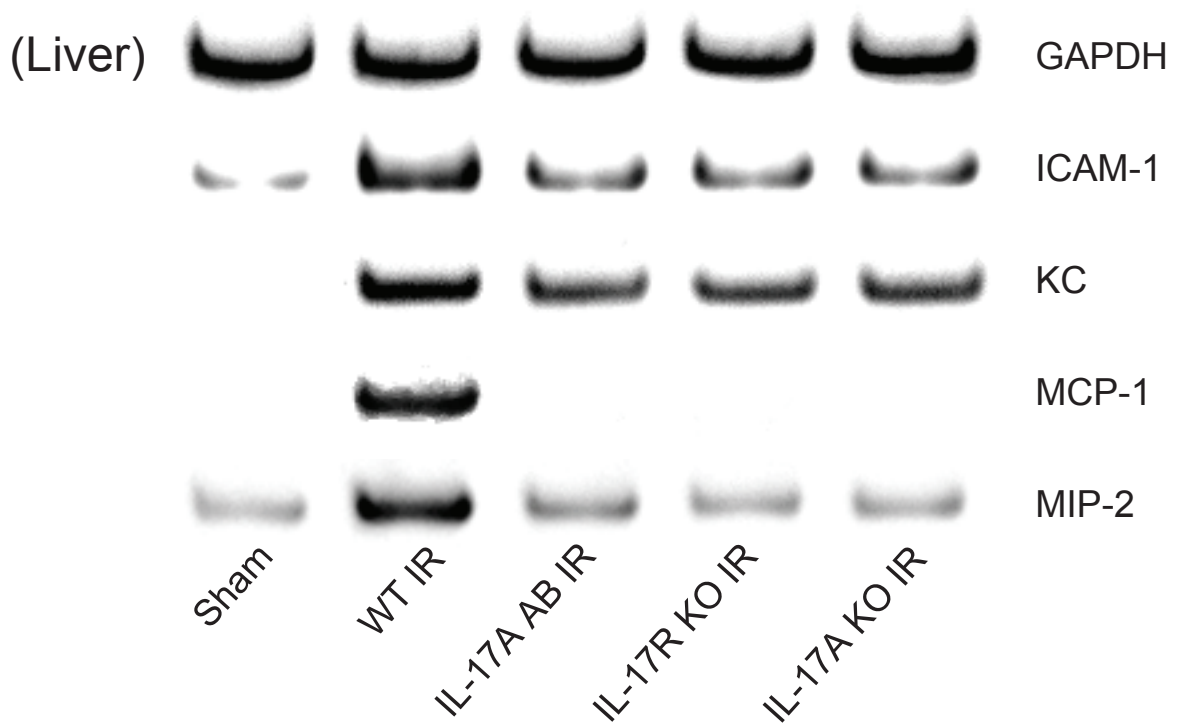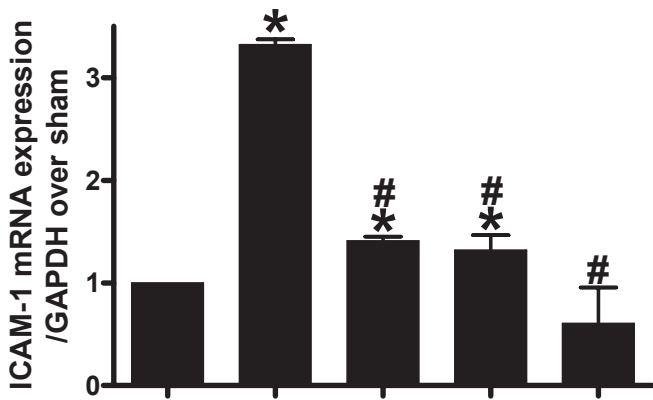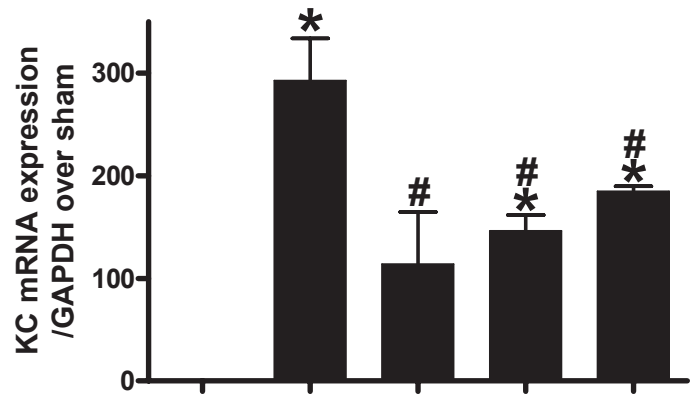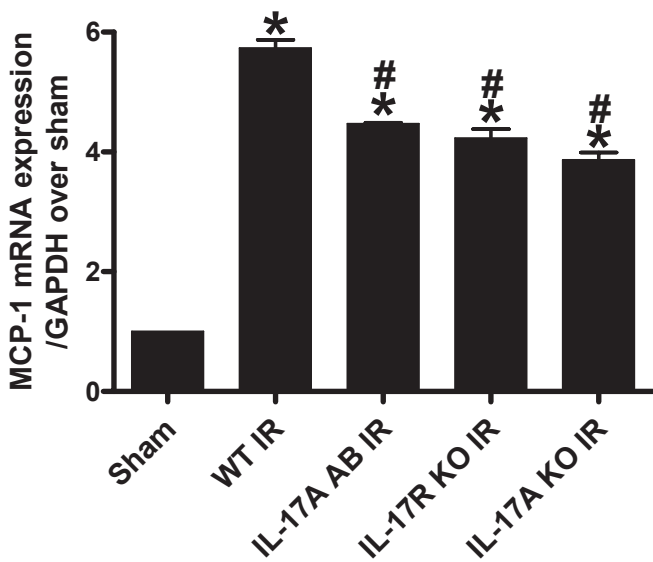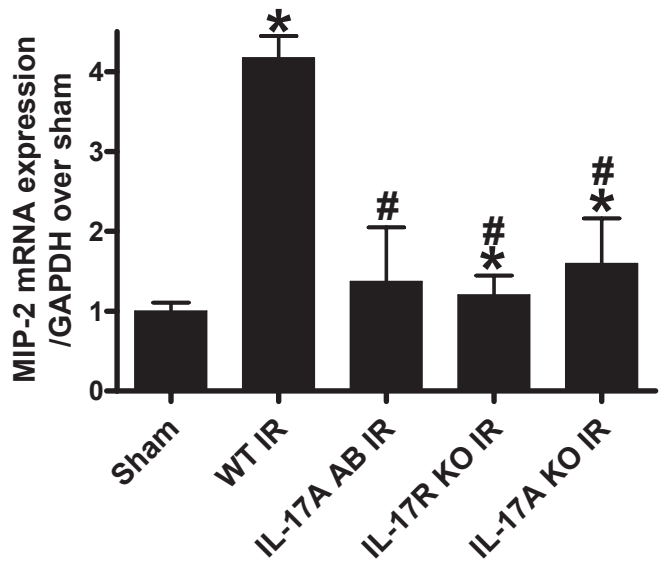

Supplement: NIHMS274034-supplement-Supp_Fig_S3a.pdf [file NIHMS274034-supplement-Supp_Fig_S3a.pdf]

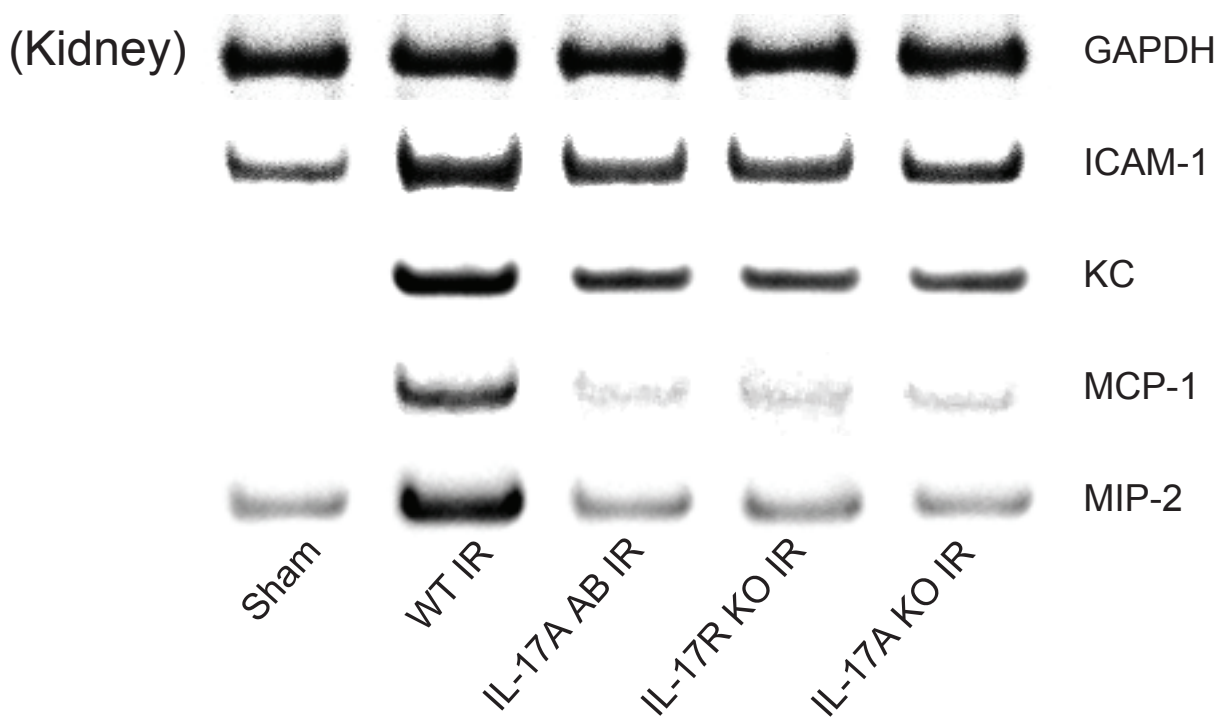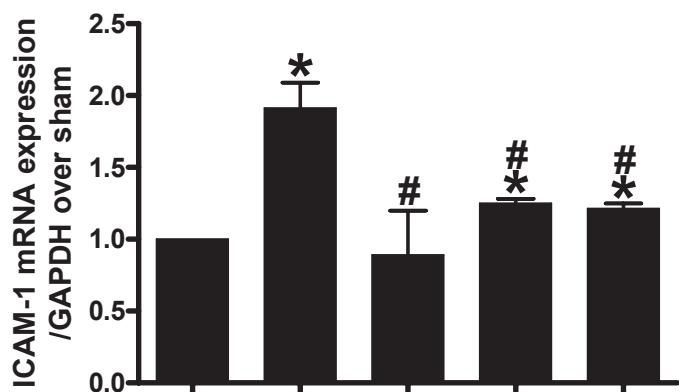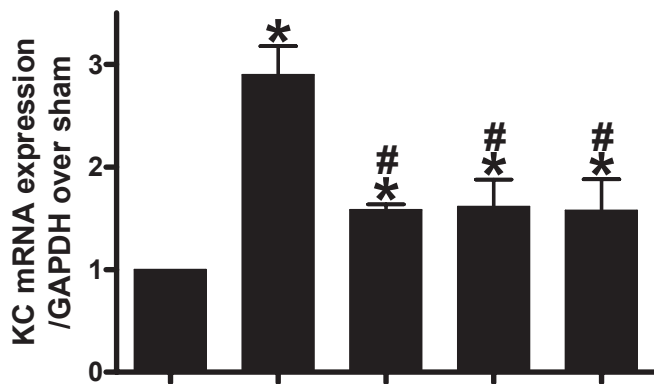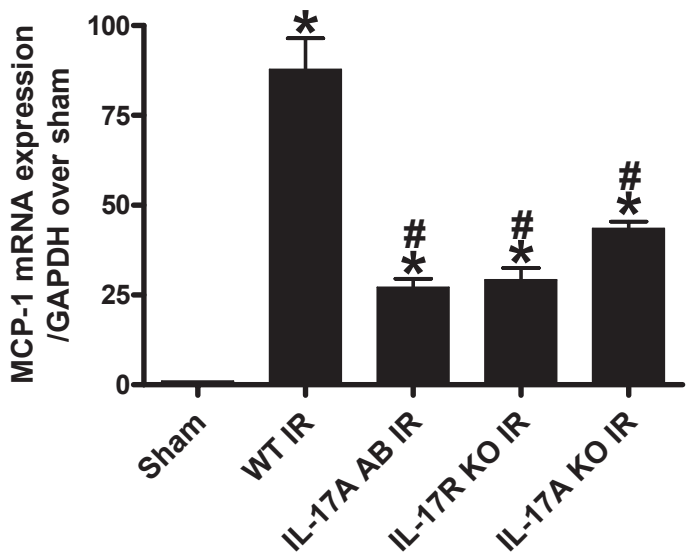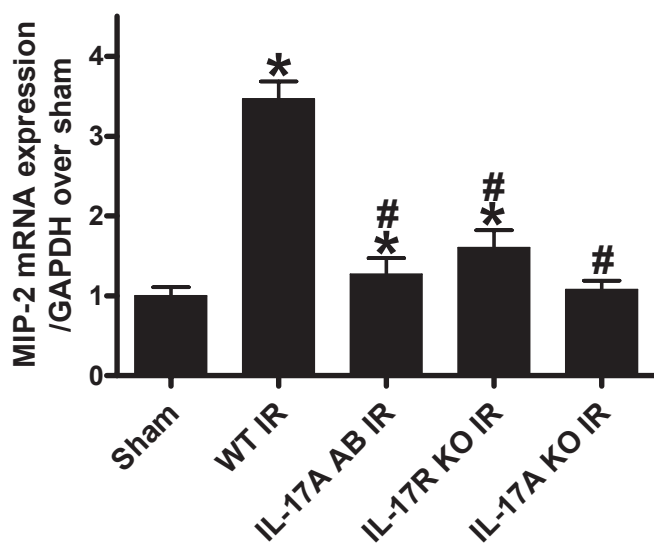

Supplement: NIHMS274034-supplement-Supp_Fig_S3b.pdf [file NIHMS274034-supplement-Supp_Fig_S3b.pdf]

**Supplemental**  
**Figure 3C**

60 min liver ischemia and 24 hr reperfusion

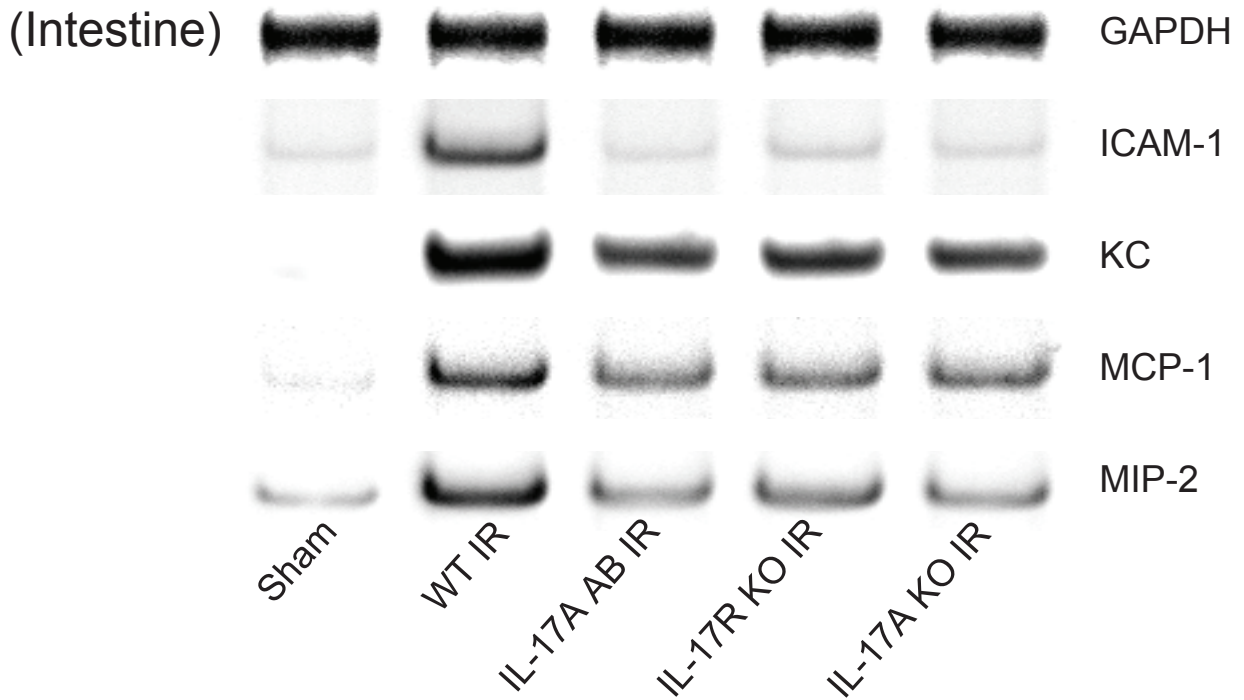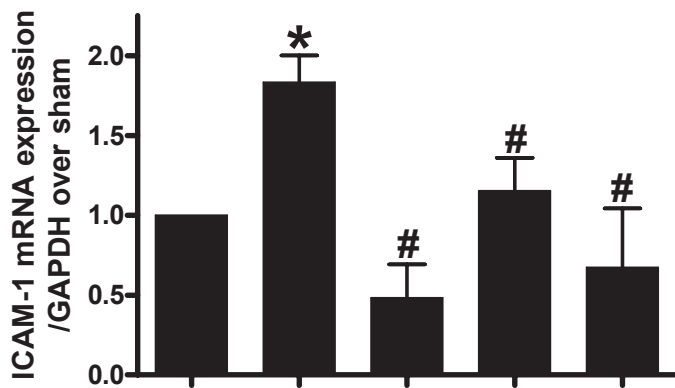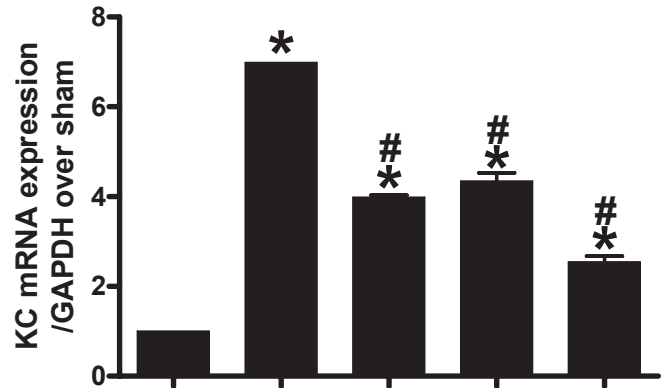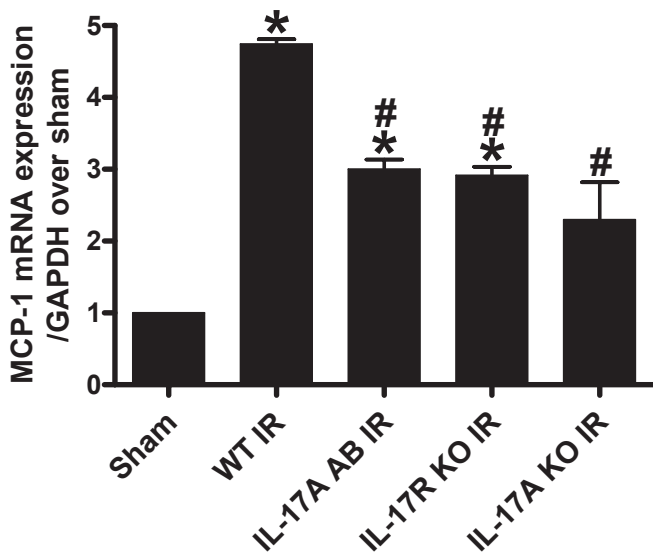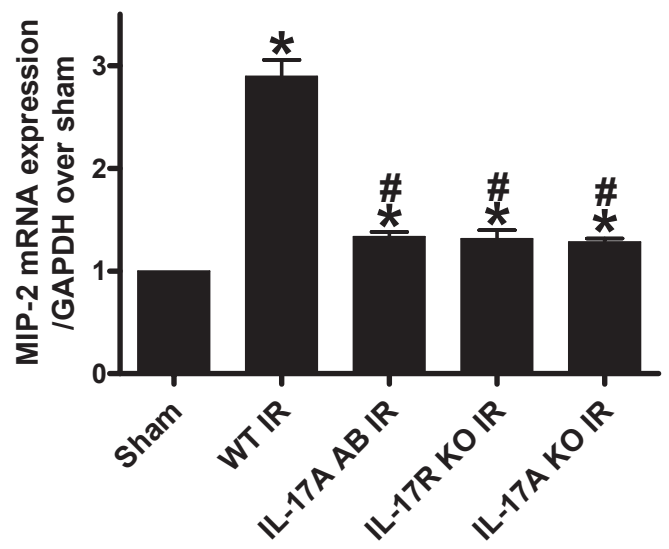

Supplement: NIHMS274034-supplement-Supp_Fig_S3c.pdf [file NIHMS274034-supplement-Supp_Fig_S3c.pdf]

# Supplemental Figure 4A

Liver (100X)

WT IR 24 hr

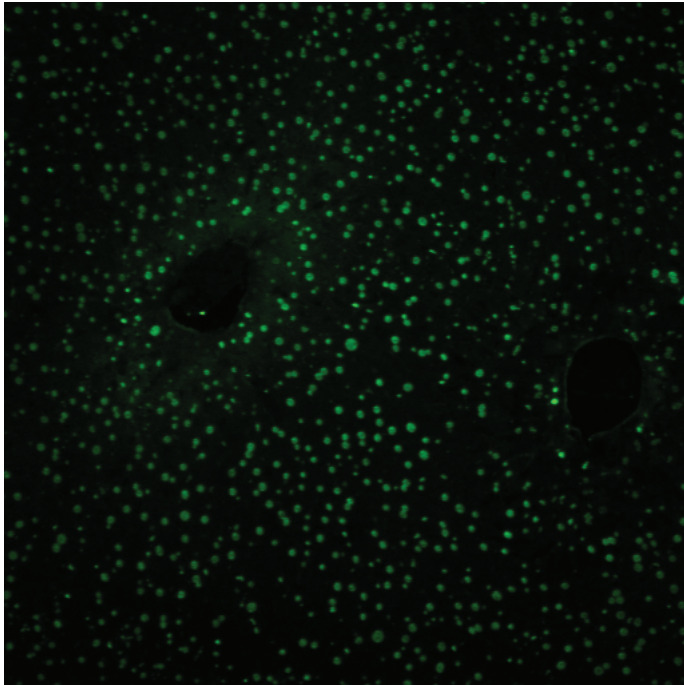

IL-17A AB WT IR 24 hr

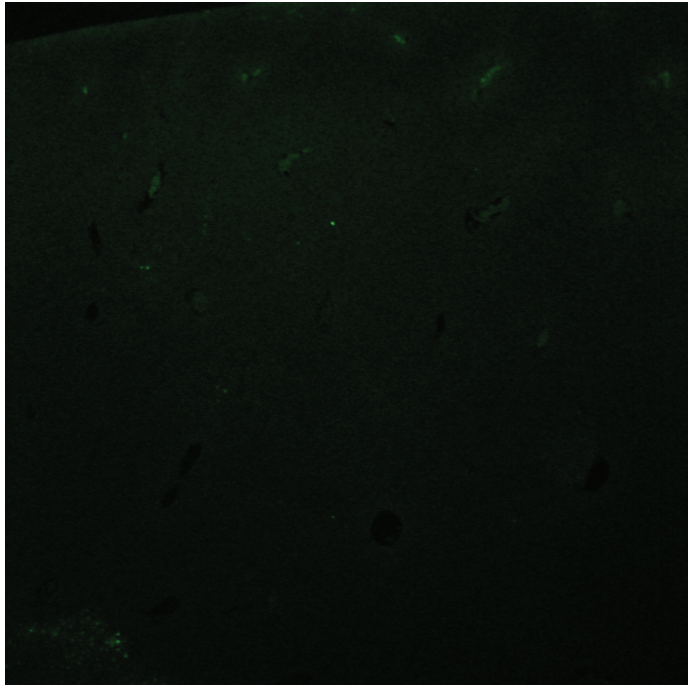

IL-17R KO IR 24 hr

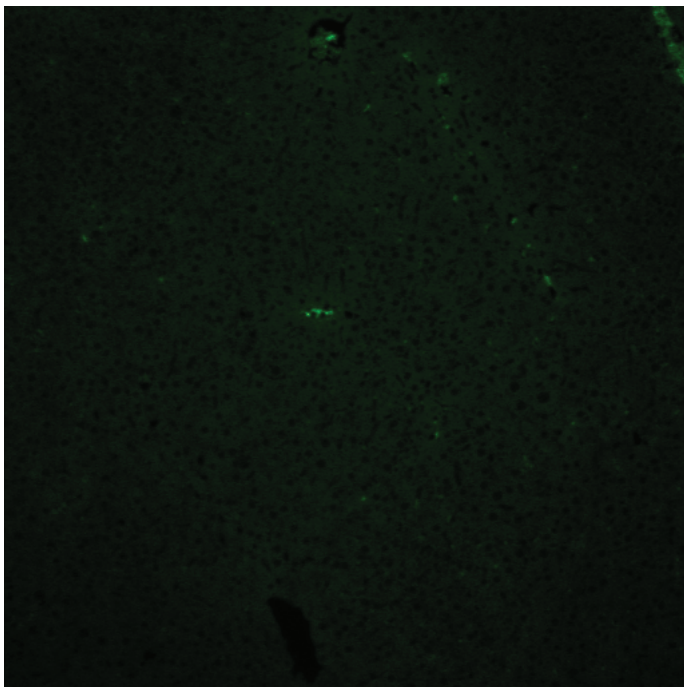

IL-17A KO IR 24 hr

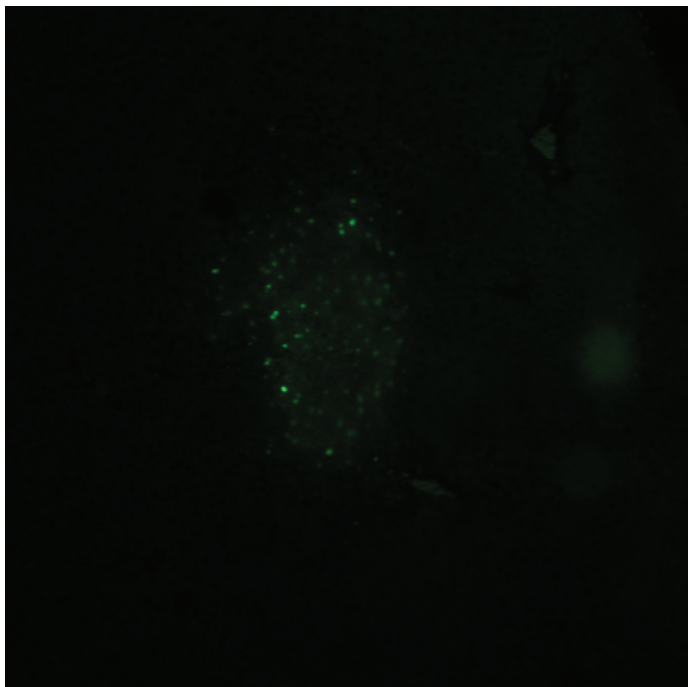

Supplement: NIHMS274034-supplement-Supp_Fig_S4a.pdf [file NIHMS274034-supplement-Supp_Fig_S4a.pdf]

# Supplemental Figure 4B

kidney (100X)

WT IR 24 hr

IL-17A AB WT IR 24 hr

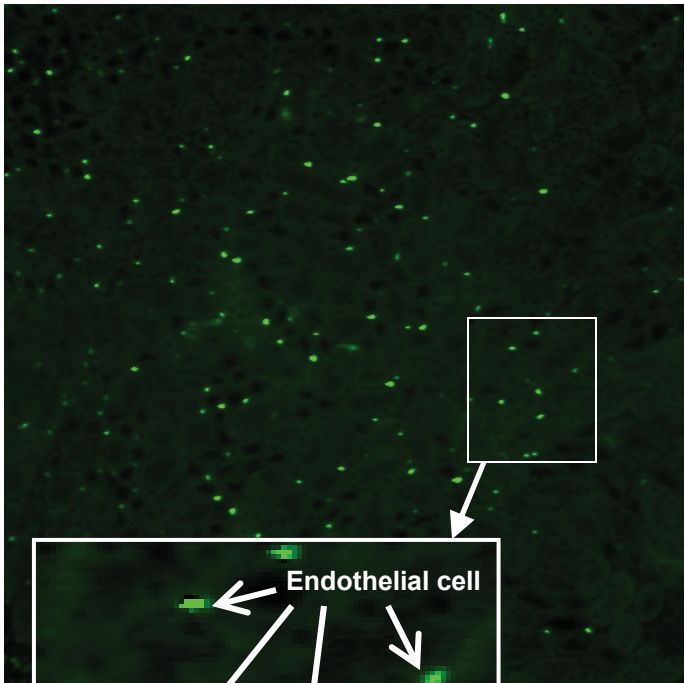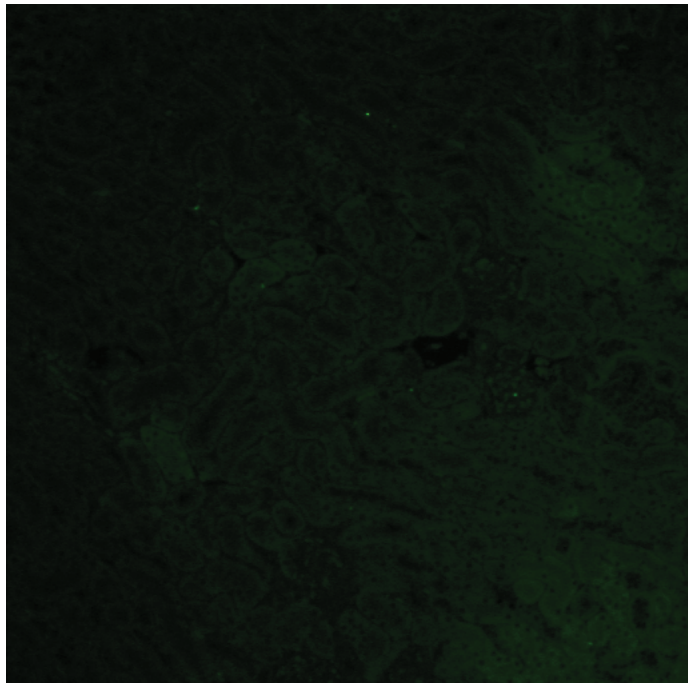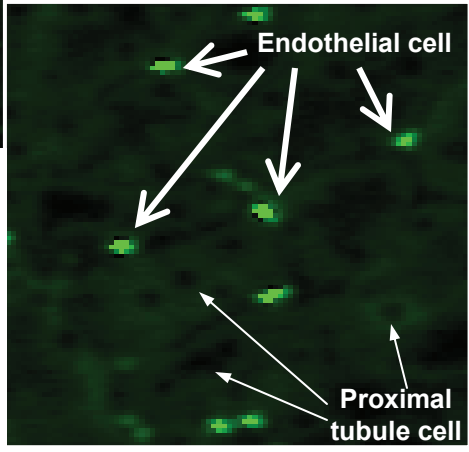

IL-17R KO IR 24 hr

IL-17A KO IR 24 hr

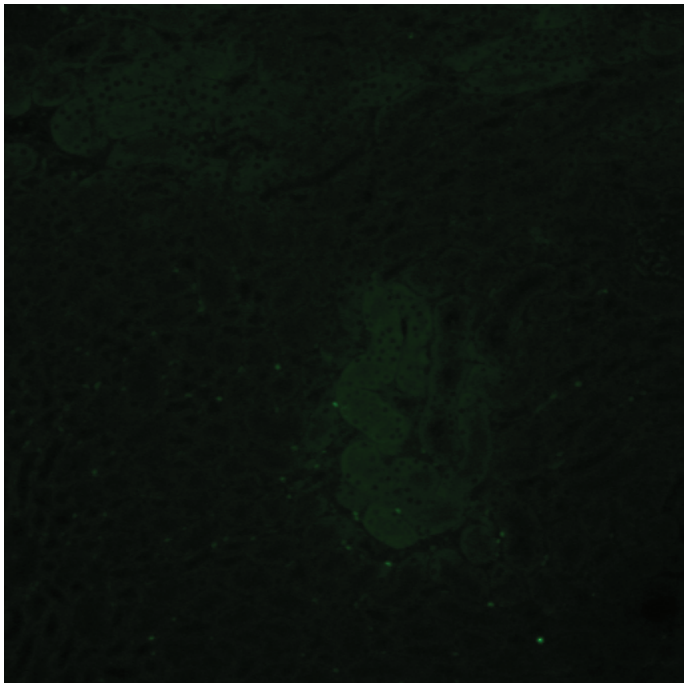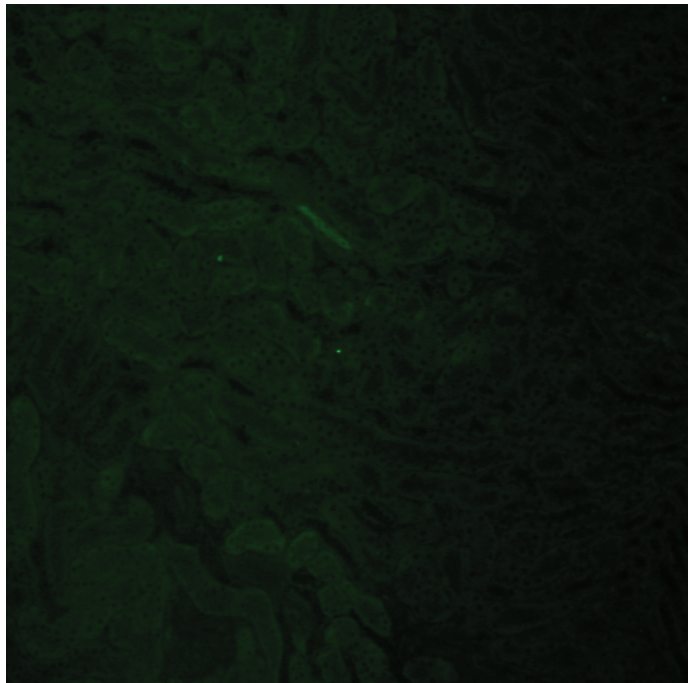

Supplement: NIHMS274034-supplement-Supp_Fig_S4b.pdf [file NIHMS274034-supplement-Supp_Fig_S4b.pdf]

# Supplemental figure 5A

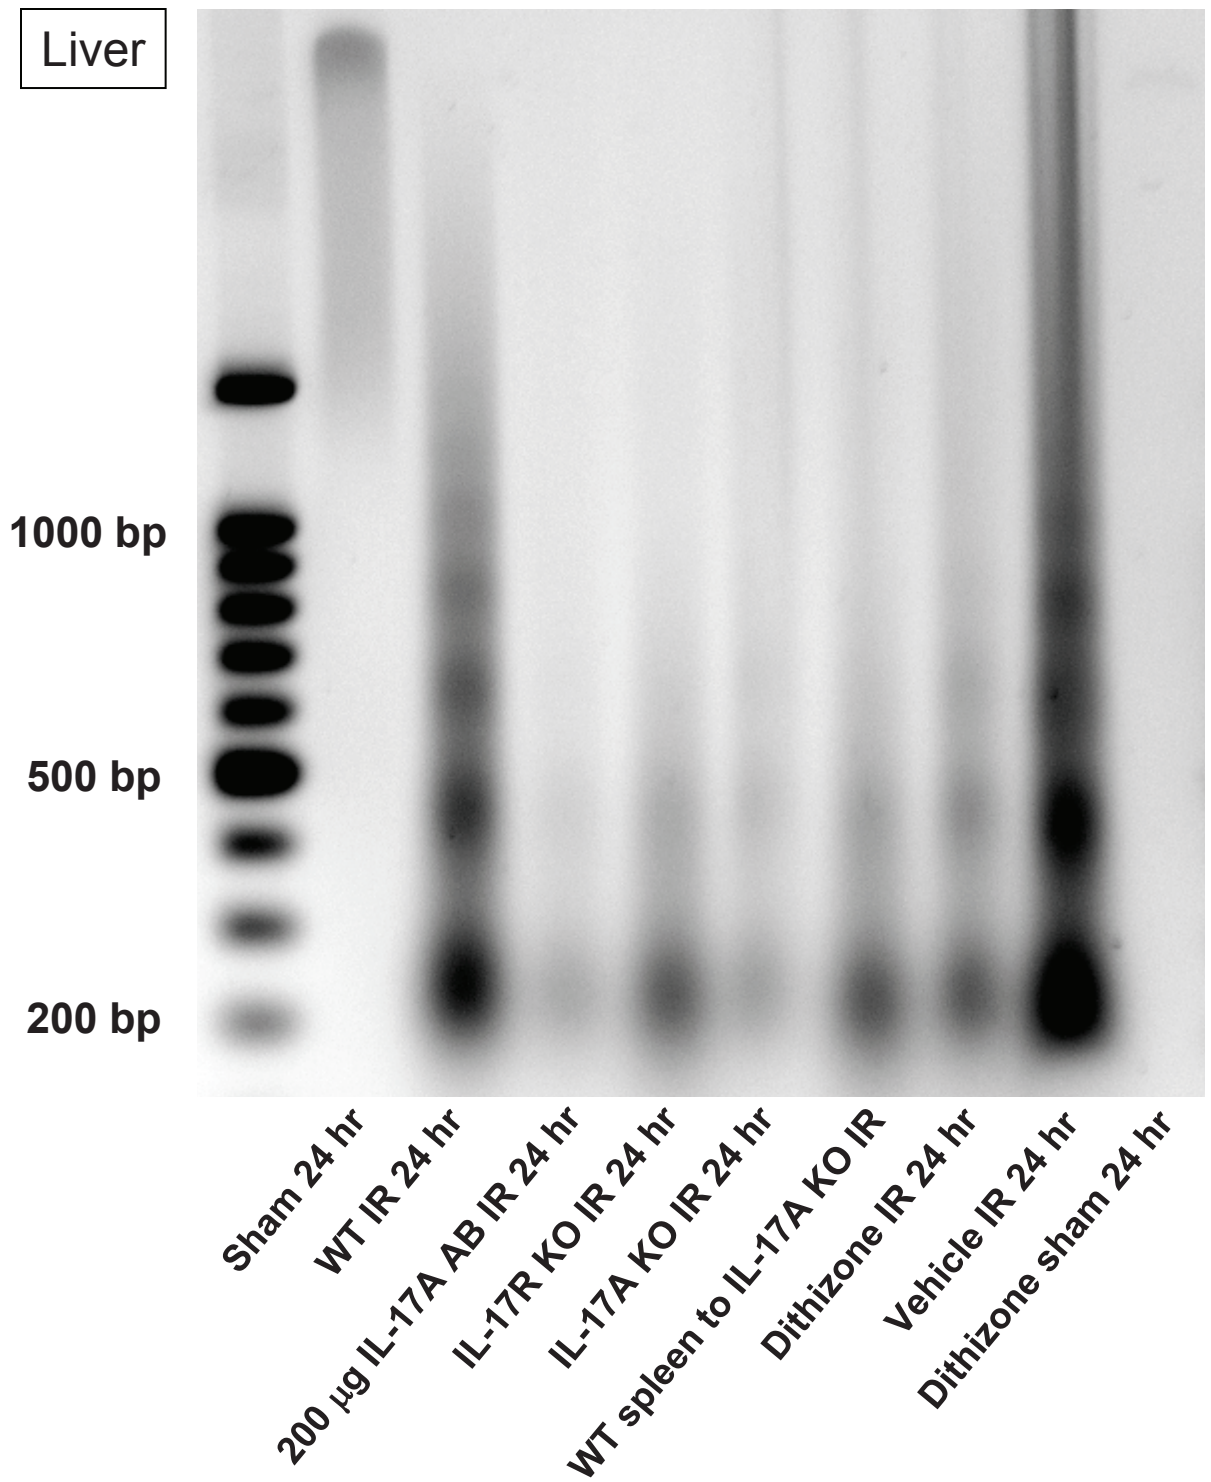

Supplement: NIHMS274034-supplement-Supp_Fig_S5a.pdf [file NIHMS274034-supplement-Supp_Fig_S5a.pdf]

# Supplemental figure 5C

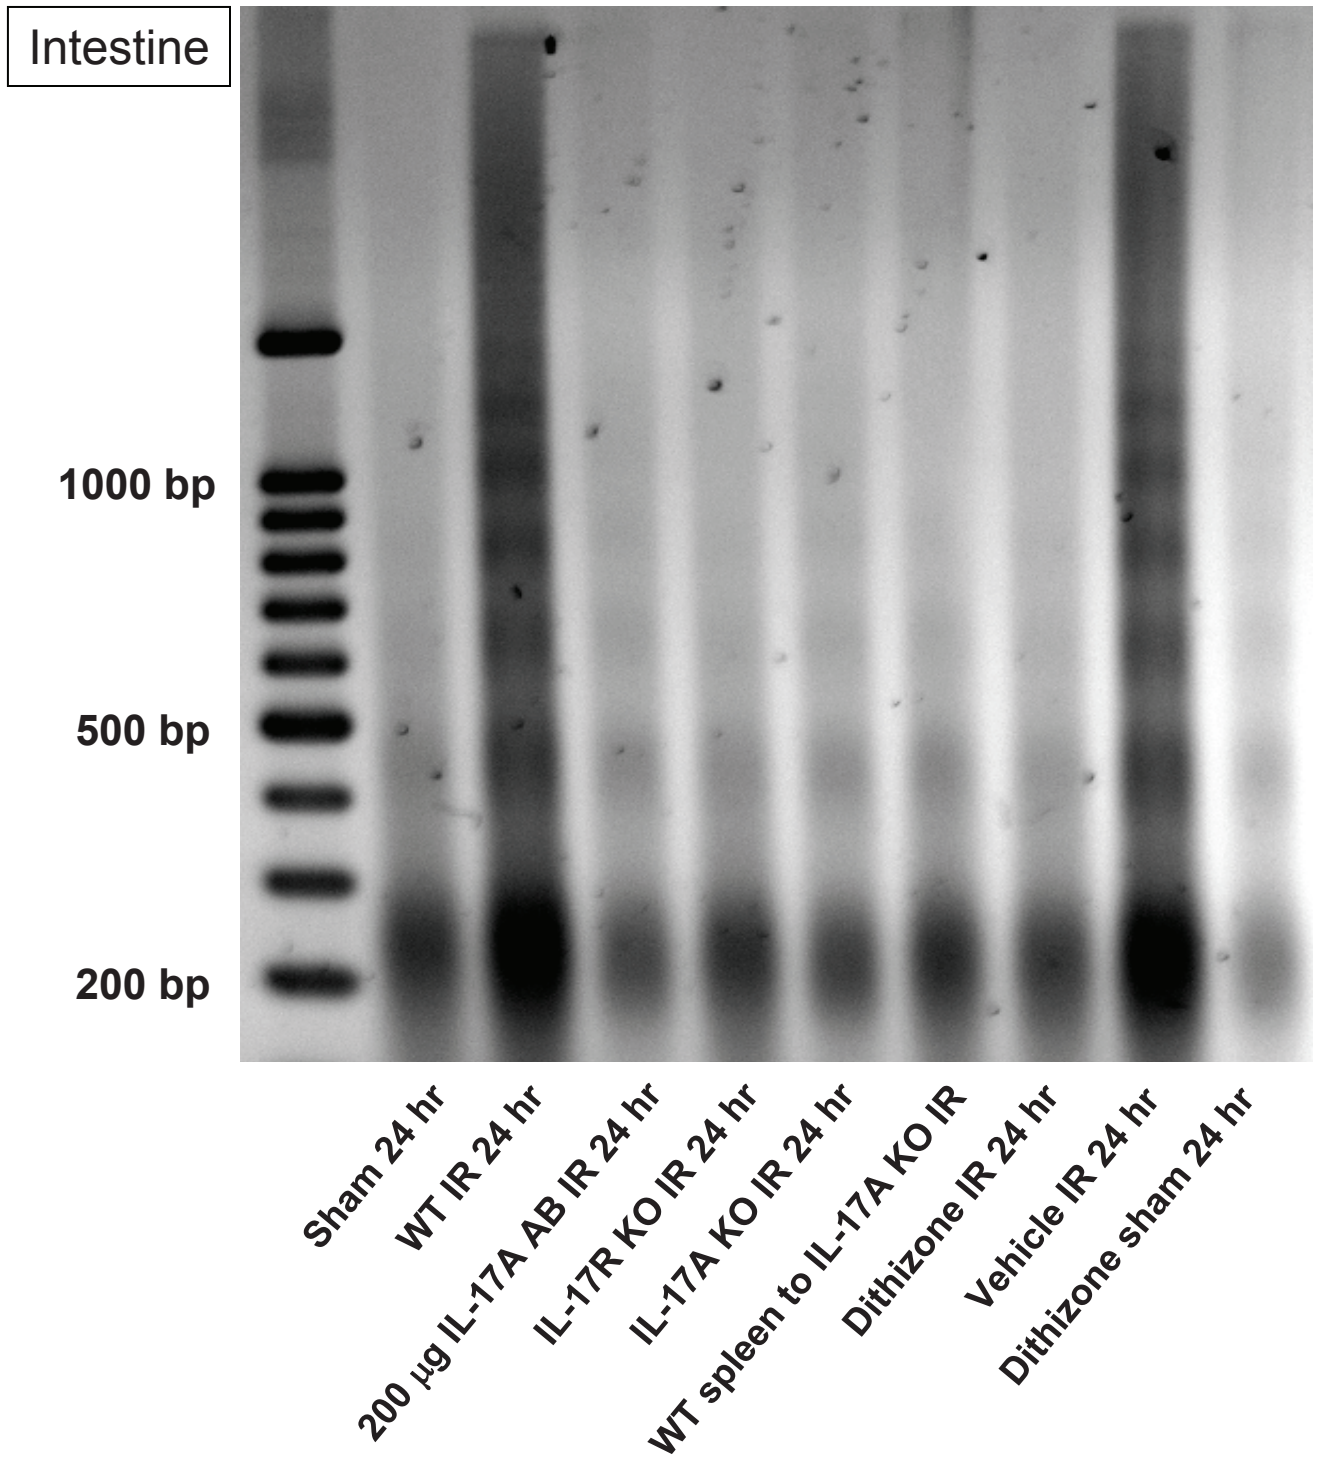

Supplement: NIHMS274034-supplement-Supp_Fig_S5c.pdf [file NIHMS274034-supplement-Supp_Fig_S5c.pdf]

60 min liver ischemia and 24 hr reperfusion

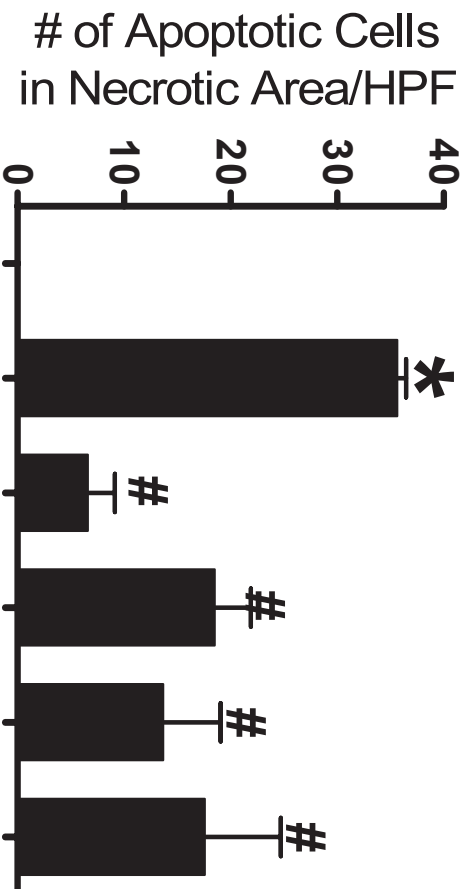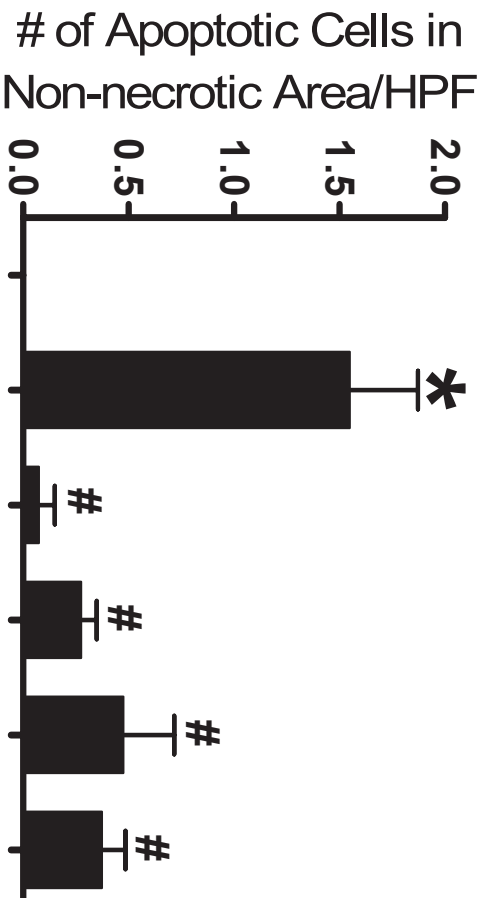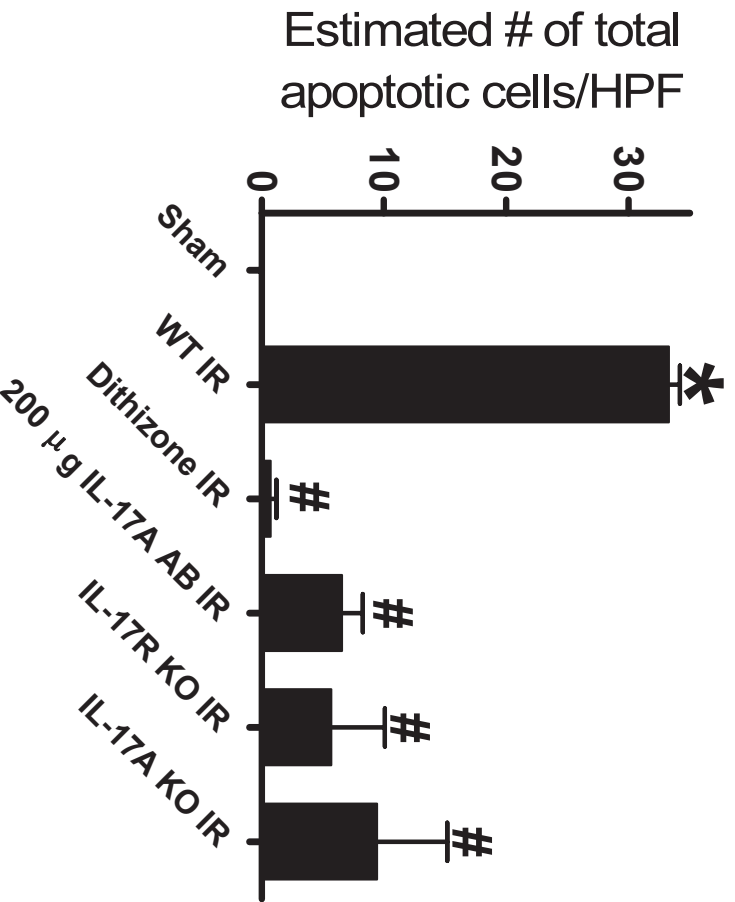

Supplement: NIHMS274034-supplement-Supp_Fig_S6.pdf [file NIHMS274034-supplement-Supp_Fig_S6.pdf]

# Supplemental figure 7A

Liver (100X)

Vehicle sham 24 hr

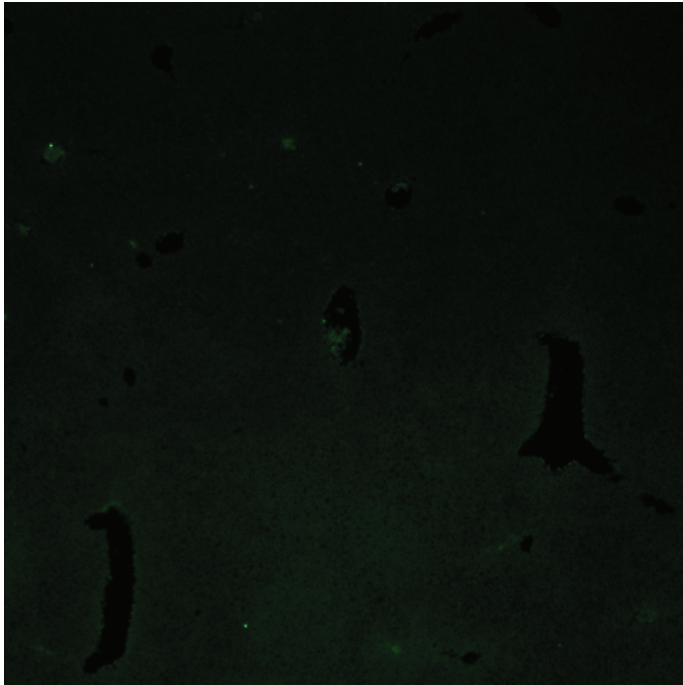

Dithizone sham 24 hr

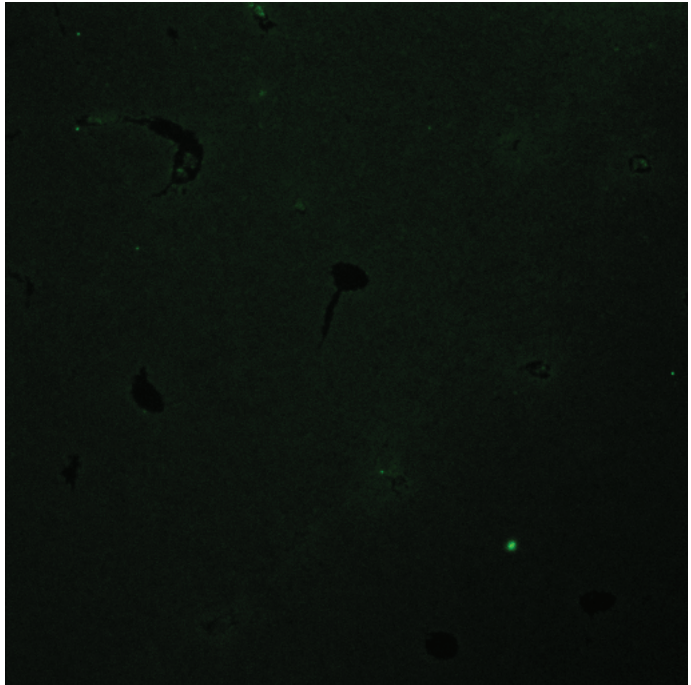

Vehicle IR 24 hr

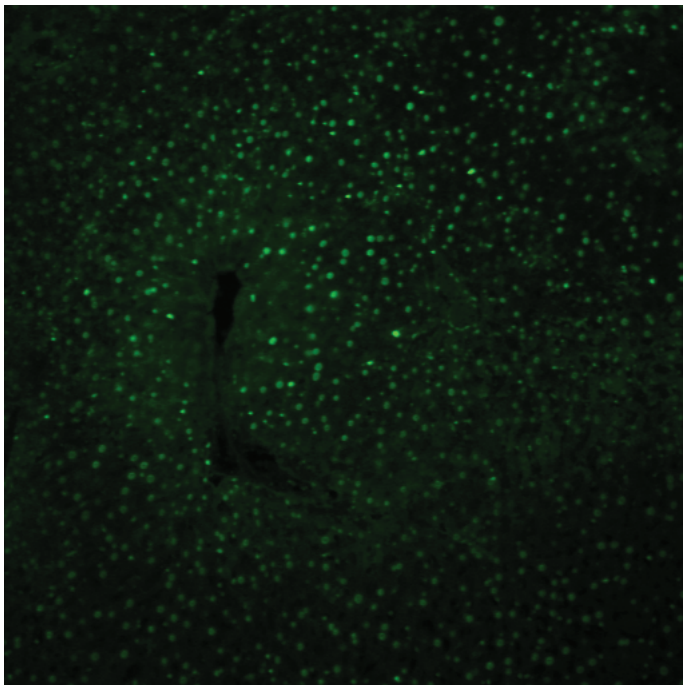

Dithizone IR 24 hr

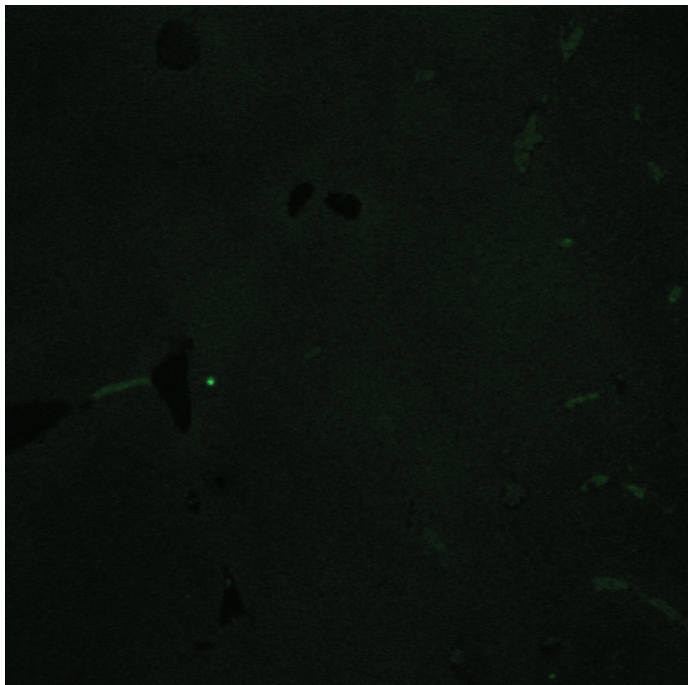

Supplement: NIHMS274034-supplement-Supp_Fig_S7a.pdf [file NIHMS274034-supplement-Supp_Fig_S7a.pdf]

# Supplemental figure 7B

kidney (100X)

Vehicle sham 24 hr

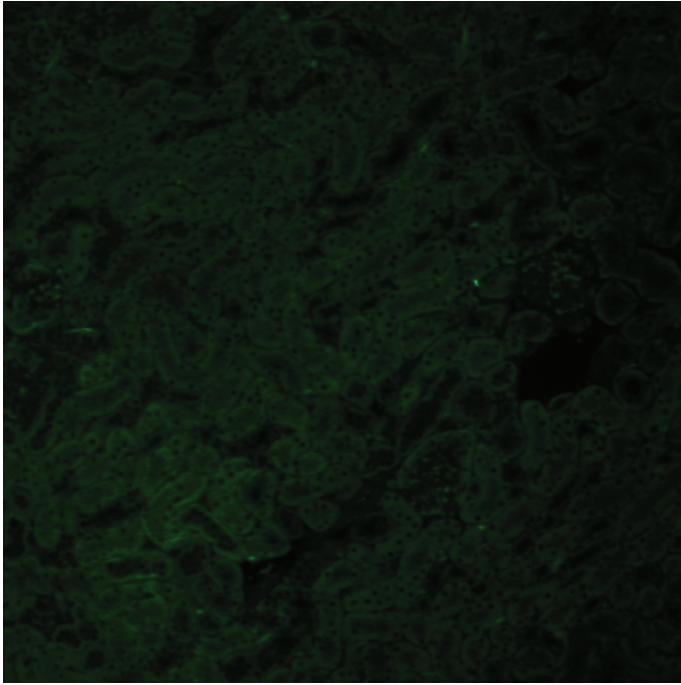

Dithizone sham 24 hr

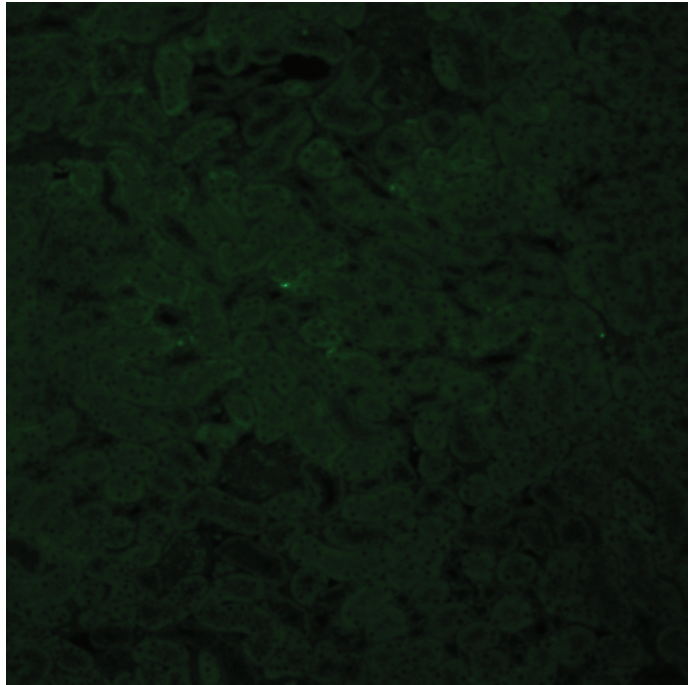

Vehicle IR 24 hr

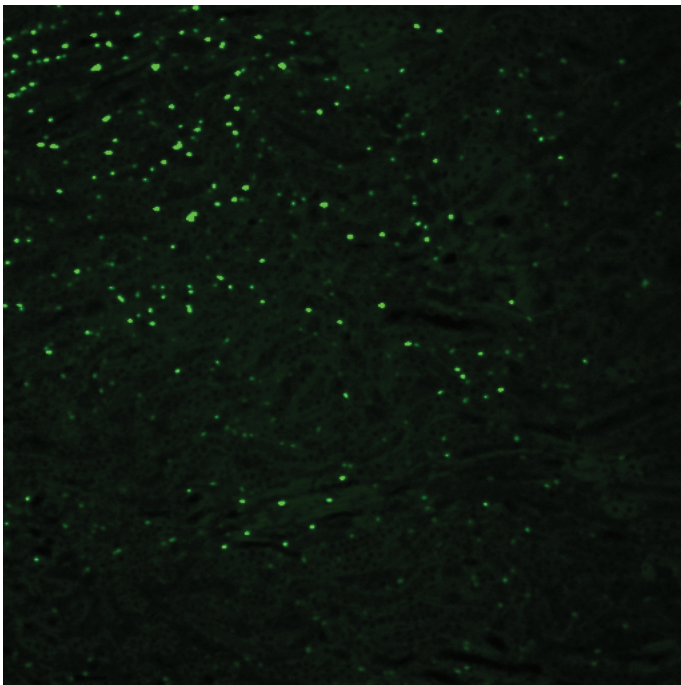

Dithizone IR 24 hr

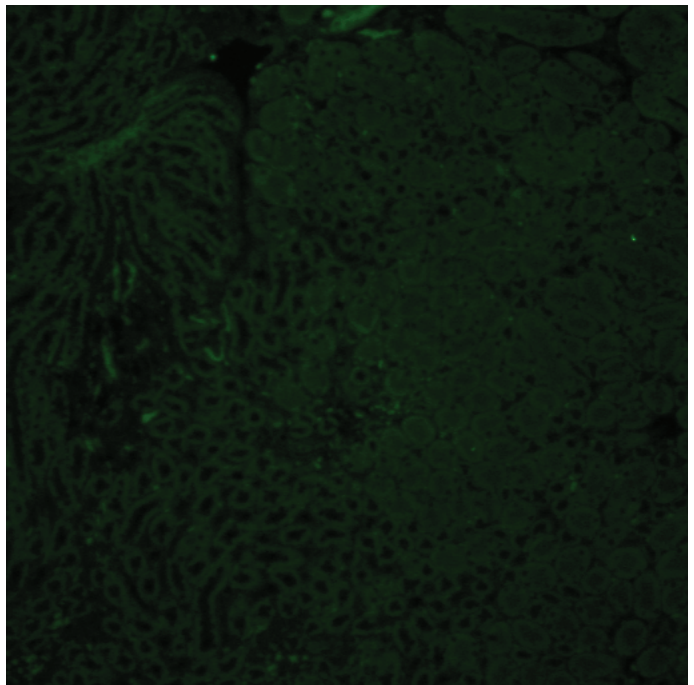

Supplement: NIHMS274034-supplement-Supp_Fig_S7b.pdf [file NIHMS274034-supplement-Supp_Fig_S7b.pdf]

**Vehicle IR 24 hr**

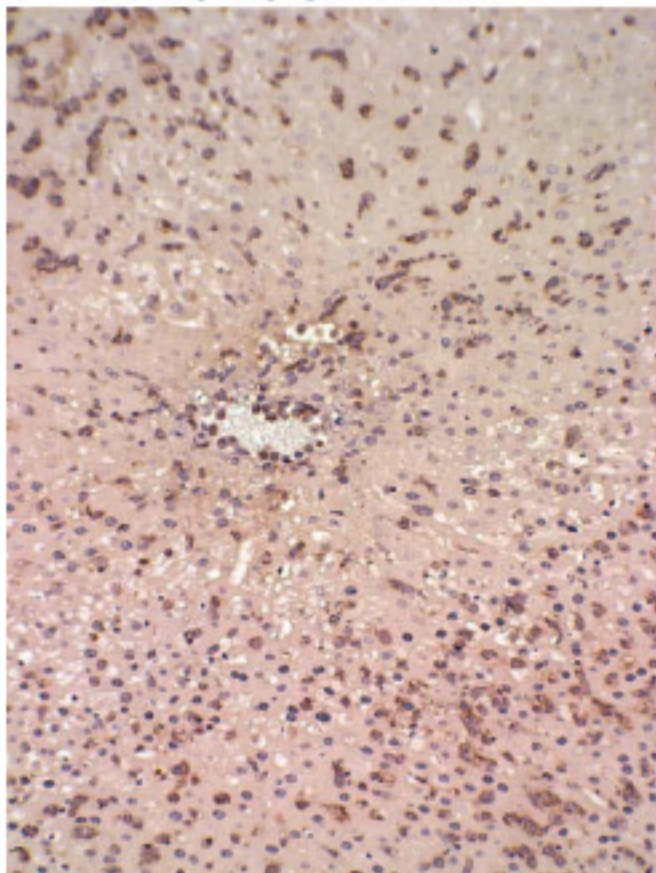

**Vehicle sham 24 hr**

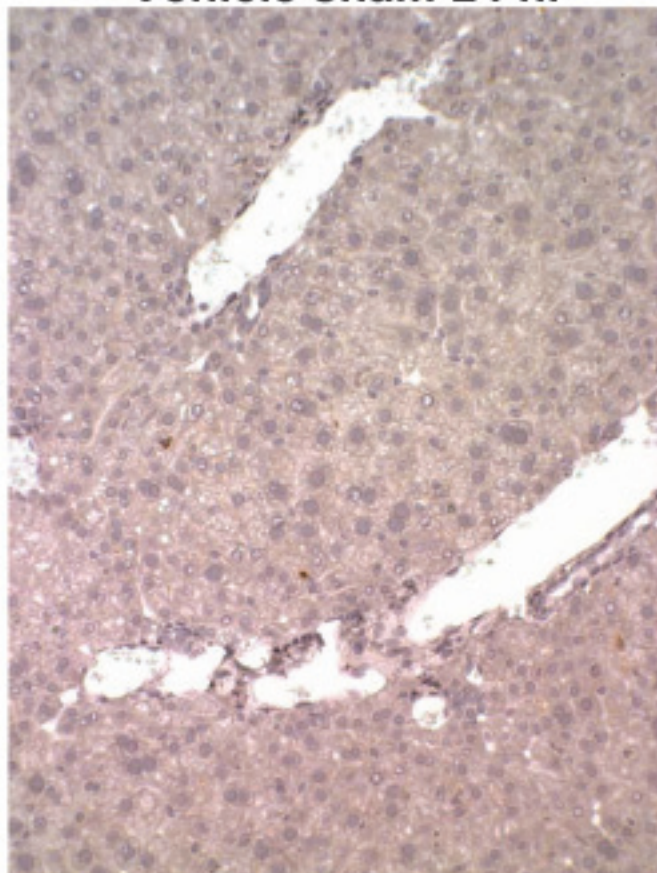

**Supplemental Figure 8A**

**Dithizone IR 24 hr**

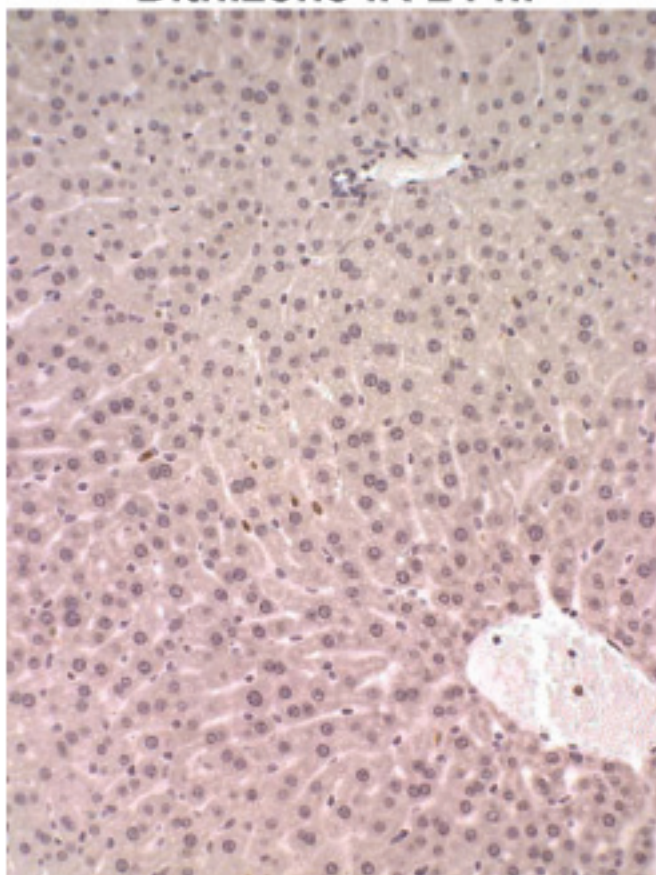

**Dithizone sham 24 hr**

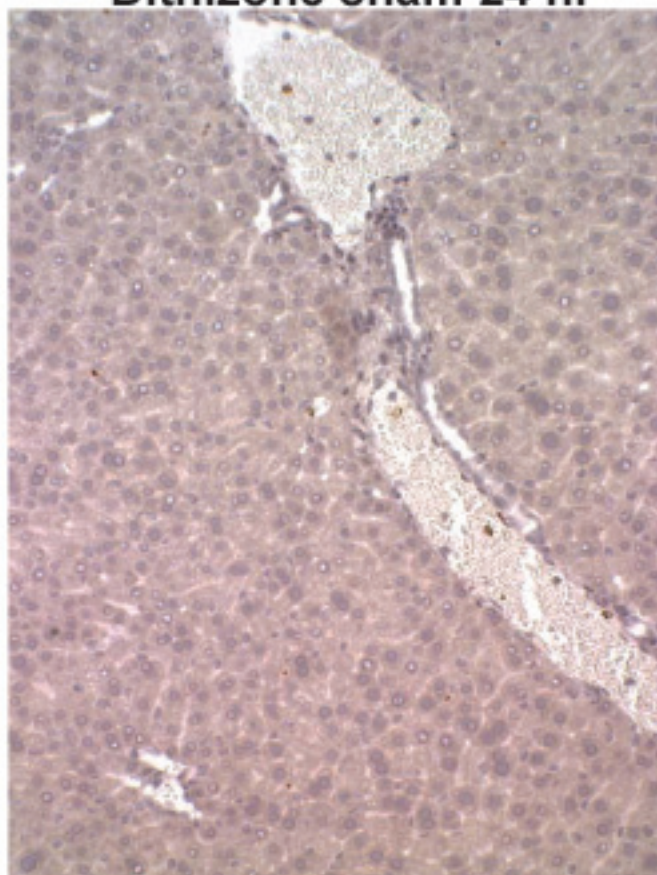

**Liver (200X)**

Supplement: NIHMS274034-supplement-Supp_Fig_S8a.pdf [file NIHMS274034-supplement-Supp_Fig_S8a.pdf]

Vehicle IR 24 hr

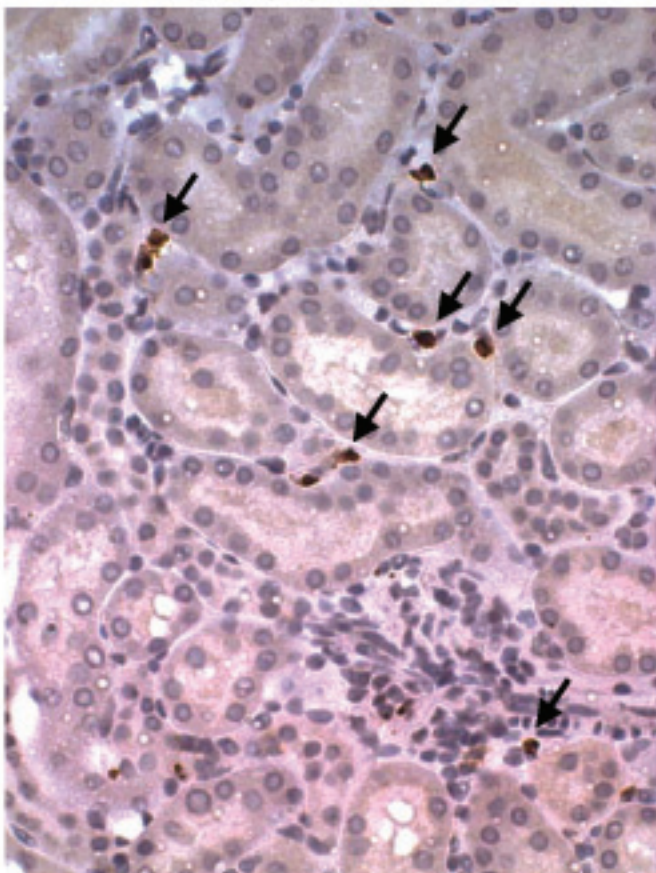

Vehicle sham 24 hr

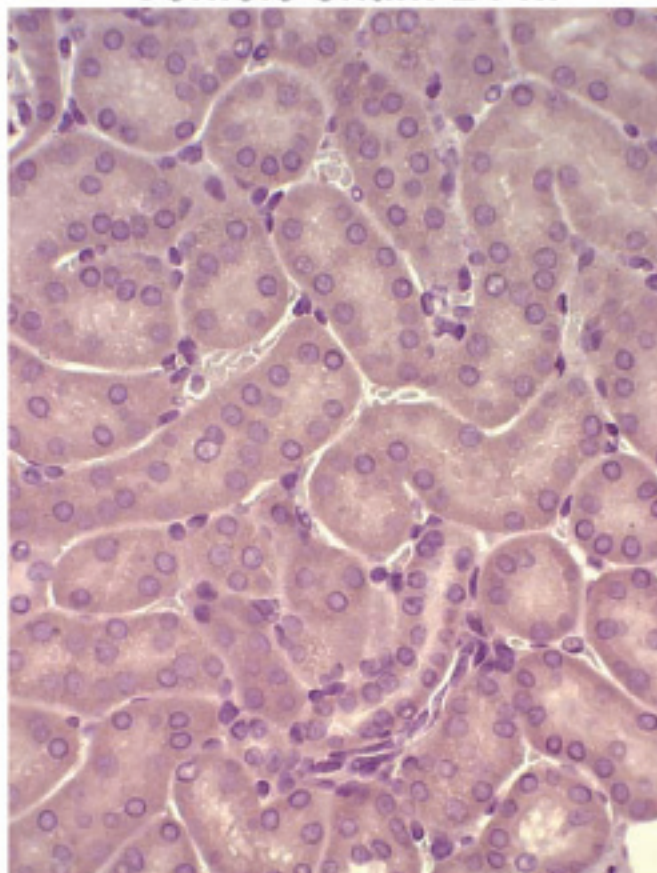

Dithizone IR 24 hr

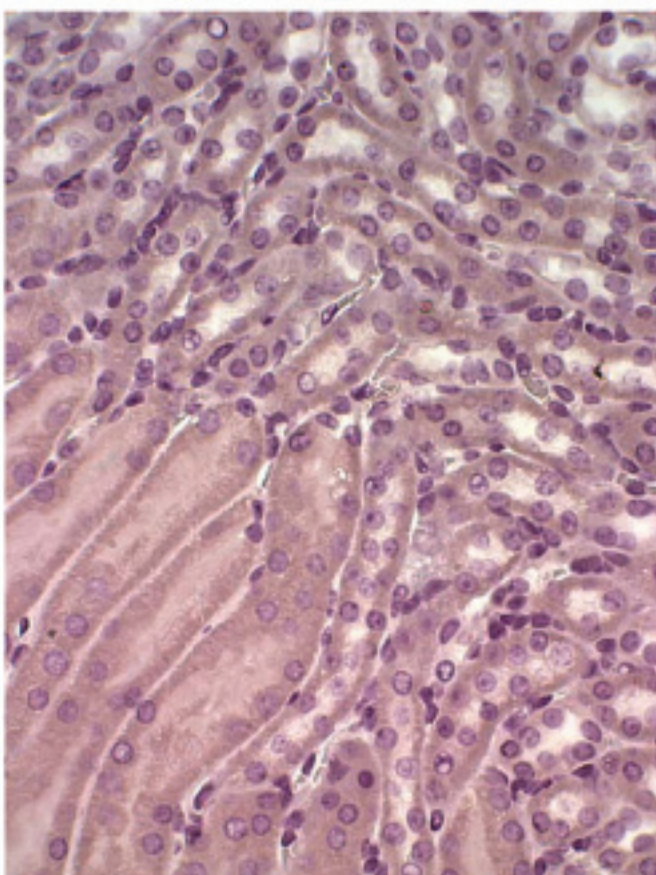

Dithizone sham 24 hr

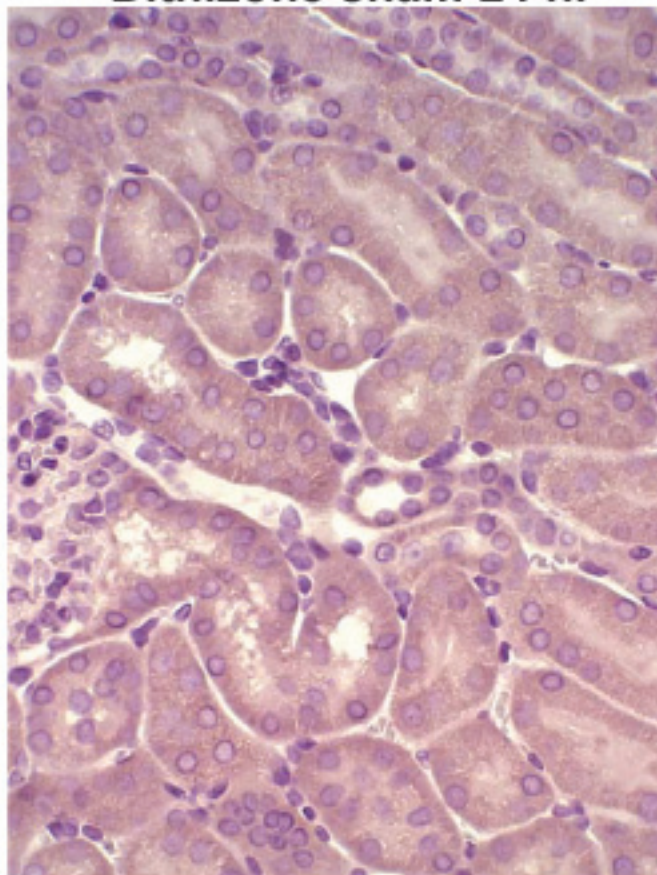

Supplement: NIHMS274034-supplement-Supp_Fig_S8b.pdf [file NIHMS274034-supplement-Supp_Fig_S8b.pdf]

**Vehicle IR 24 hr**

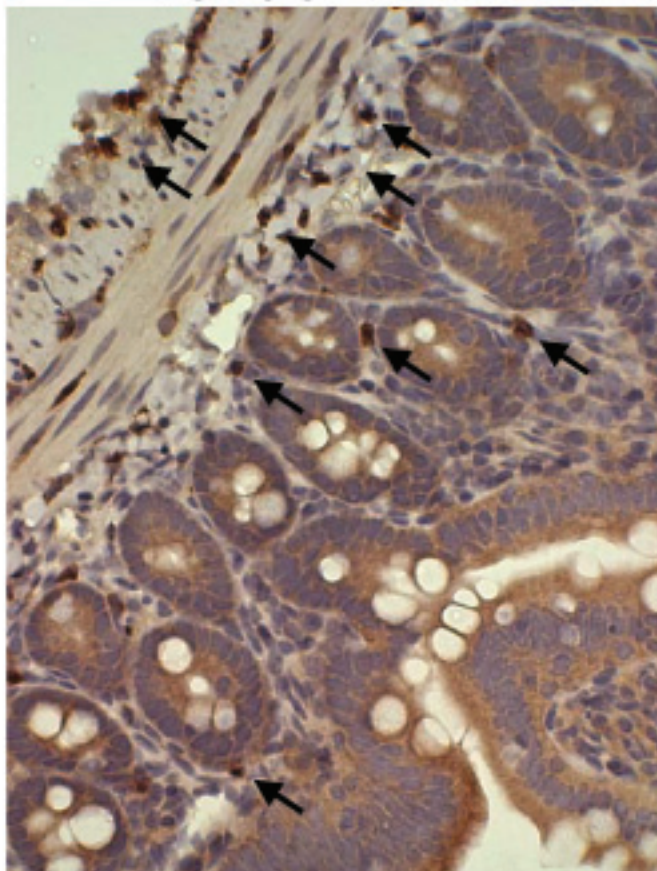

**Vehicle sham 24 hr**

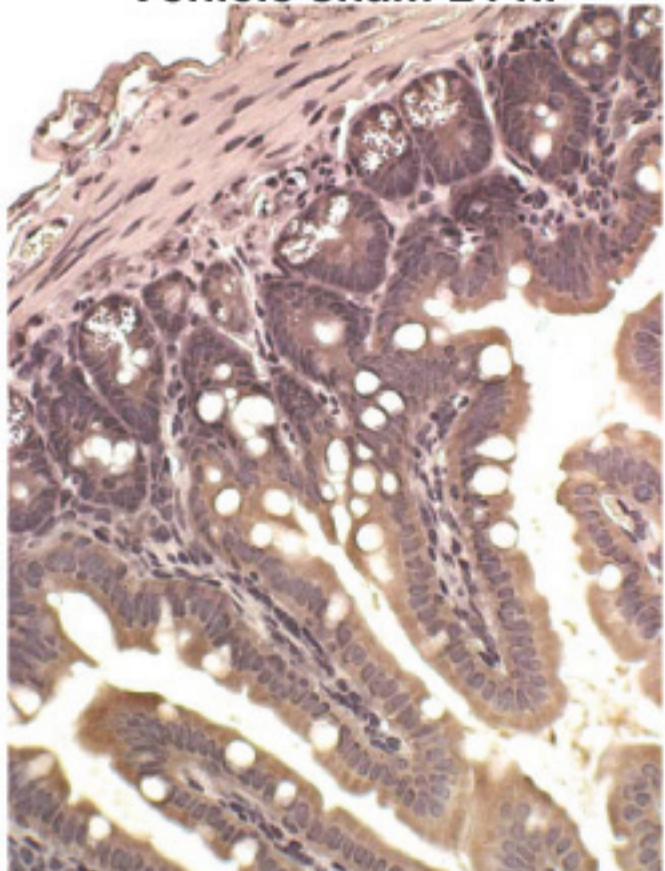

**Dithizone IR 24 hr**

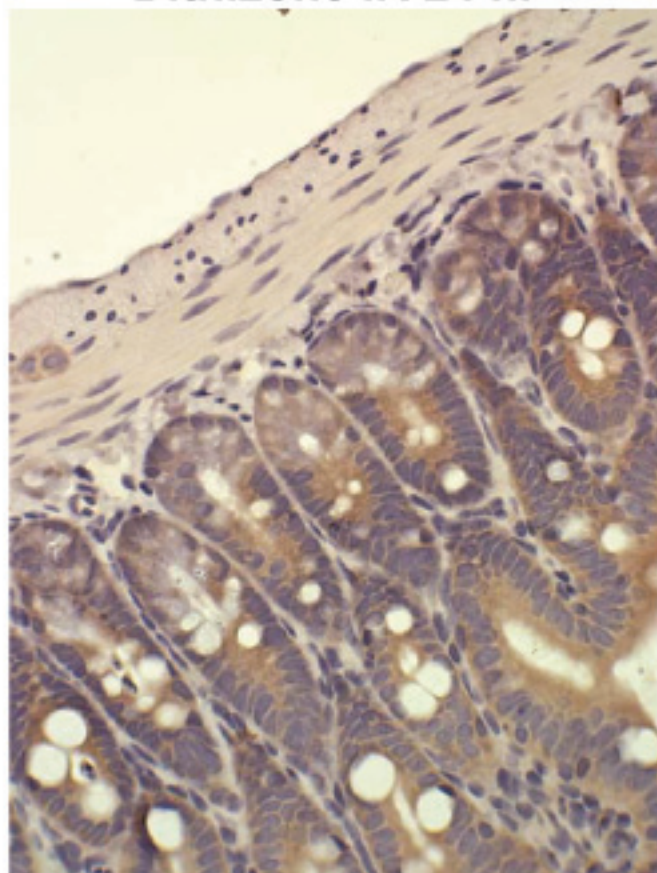

**Dithizone sham 24 hr**

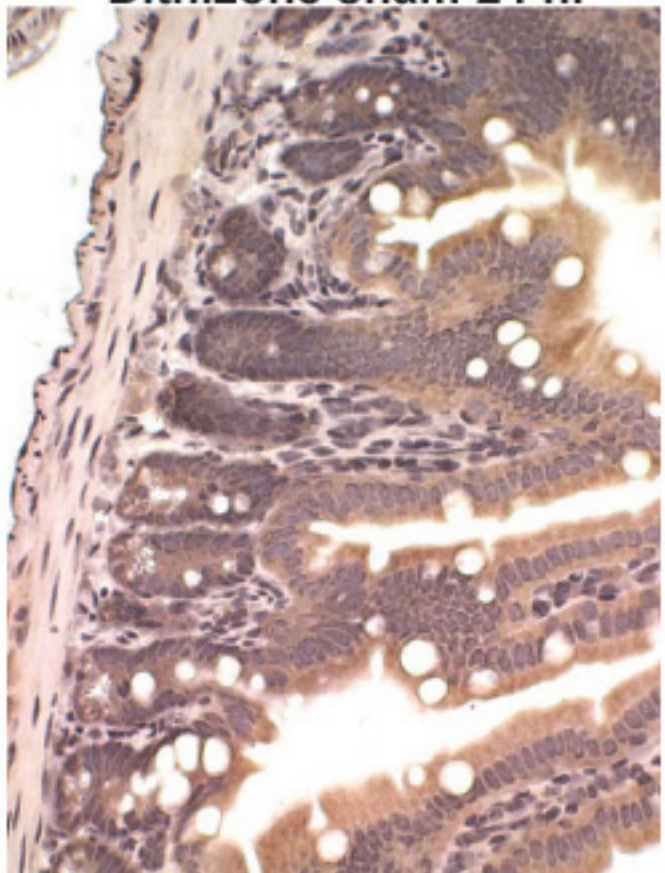

Supplement: NIHMS274034-supplement-Supp_Fig_S8c.pdf [file NIHMS274034-supplement-Supp_Fig_S8c.pdf]
